# Supplementary material for: Genome-wide characterization and expression analyses of superoxide dismutase (SOD) genes in Gossypium hirsutum
Source: PubMed Central journal article supplement (PMC5429560; doi:10.1186/s12864-017-3768-5), 2017-05-12
Supplement: 12864_2017_3768_MOESM1_ESM.pdf [file 12864_2017_3768_MOESM1_ESM.pdf]

**Additional file 1: Table S1.** Gene numbers of *SOD* gene family in 18 plant genomes.

| Gene group       | Plant species |          |                    |                   |                   |                   |                   |                   |                   |                   |                     |                       |                       |                       |                          |                        |                         |
|------------------|---------------|----------|--------------------|-------------------|-------------------|-------------------|-------------------|-------------------|-------------------|-------------------|---------------------|-----------------------|-----------------------|-----------------------|--------------------------|------------------------|-------------------------|
|                  | Algae         | Moss     | Amborellaceae      | Monocots          |                   |                   |                   |                   |                   |                   |                     | Eudicots              |                       |                       |                          |                        |                         |
|                  | Cr            | Pp       | Amt <sup>1,2</sup> | Bd <sup>1-3</sup> | Hv <sup>1-3</sup> | Os <sup>1-3</sup> | Sb <sup>1-3</sup> | Si <sup>1-3</sup> | Zm <sup>1-4</sup> | Ta <sup>1-5</sup> | Ma <sup>1-4,6</sup> | At <sup>1,2,7,8</sup> | Ga <sup>1,2,7,9</sup> | Gr <sup>1,2,7,9</sup> | Gh <sup>1,2,7,9,10</sup> | Pt <sup>1,2,7,11</sup> | Gm <sup>1,2,12,13</sup> |
| <i>Cu/Zn-SOD</i> | 0             | 3        | 3                  | 3                 | 3                 | 4                 | 4                 | 4                 | 5                 | 10                | 6                   | 3                     | 5                     | 5                     | <b>10</b>                | 6                      | 6                       |
| <i>Mn-SOD</i>    | 5             | 1        | 1                  | 1                 | 1                 | 1                 | 1                 | 1                 | 2                 | 2                 | 4                   | 2                     | 2                     | 2                     | <b>4</b>                 | 2                      | 2                       |
| <i>Fe-SOD</i>    | 1             | 2        | 2                  | 2                 | 2                 | 2                 | 2                 | 2                 | 3                 | 6                 | 2                   | 3                     | 2                     | 2                     | <b>4</b>                 | 3                      | 5                       |
| <b>Total</b>     | <b>6</b>      | <b>6</b> | <b>6</b>           | <b>6</b>          | <b>6</b>          | <b>7</b>          | <b>7</b>          | <b>7</b>          | <b>10</b>         | <b>18</b>         | <b>12</b>           | <b>8</b>              | <b>9</b>              | <b>9</b>              | <b>18</b>                | <b>11</b>              | <b>13</b>               |

**Cr**, *Chlamydomonas reinhardtii*; **Pp**, *Physcomitrella patens*; **Amt**, *Amborella trichopoda*; **Bd**, *Brachypodium distachyon*; **Hv**, *Hordeum vulgare*; **Os**, *Oryza sativa*; **Sb**, *Sorghum bicolor*; **Si**, *Setaria italica*; **Zm**, *Zea mays*; **Ma**, *Musa acuminata*; **Ta**, *Triticum aestivum*; **At**, *Arabidopsis thaliana*; **Ga**, *Gossypium arboreum*; **Gr**, *Gossypium raimondii*; **Pt**, *Populus trichocarpa*; **Gm**, *Glycine max*; **WGD**, whole-genome duplication; **Mya**, million years ago.

<sup>1</sup>, ancestral seed plant WGD ( $\zeta$ ) ~310 Mya; <sup>2</sup>, the paleohexaploidization event ( $\epsilon$ ) common to all eudicots 130-190 Mya; <sup>3</sup>, two WGD in monocots ( $\sigma$  and  $\rho$ ) inferred to have pre-dated the diversification of Poaceae; <sup>4</sup>, allotetraploid in maize ~13 Mya; <sup>5</sup>, one lineage-specific polyploid event (hexaploid) in bread wheat; <sup>6</sup>, three lineage-specific WGD rounds occurred during banana evolution; <sup>7</sup>, one whole genome triplication (WGT) event ( $\gamma$ ) probably shared by all core eudicots; <sup>8</sup>, two recent WGDs ( $\alpha$  and  $\beta$ ) within the crucifer lineage; <sup>9</sup>, one penta- or hexaploid duplication event in the *Gossypium* lineage after splitting from cacao lineage ~60 Mya; <sup>10</sup>, neoallopolyploids reuniting divergent *Gossypium* genomes 1-2 Mya; <sup>11</sup>, one lineage-specific WGD event occurred during poplar evolution; <sup>12</sup>, the legume-specific WGD event 58 Mya; <sup>13</sup>, the *Glycine* WGD event 13 Mya.
