# Supplementary material for: Genome-wide characterization and expression analyses of superoxide dismutase (SOD) genes in Gossypium hirsutum
Source: PubMed Central journal article supplement (PMC5429560; doi:10.1186/s12864-017-3768-5), 2017-05-12
Supplement: 12864_2017_3768_MOESM2_ESM.pdf [file 12864_2017_3768_MOESM2_ESM.pdf]

**Additional file 2: Table S6.** The predictions of *GhSODs* and *GhCCSs* targeted by the miRNAs of *G. hirsutum*.

| Target_Acc.    | miRNA_Acc.     | Expectation | UPE    | miRNA |     | Target |      |        | miRNA_aligned_fragment   | Target_aligned_fragment | Inhibition  |
|----------------|----------------|-------------|--------|-------|-----|--------|------|--------|--------------------------|-------------------------|-------------|
|                |                |             |        | start | end | start  | end  | region |                          |                         |             |
| <i>GhCSD3</i>  | ghr-miRnF      | 3           | 17.469 | 1     | 20  | 253    | 272  | CDS    | UCGGACUGGAUUUGUUGACA     | UGUCAACAGGUAAGUCCGA     | Translation |
|                | novel_mir_1200 | 3           | 17.829 | 1     | 20  | 273    | 292  | CDS    | AGGAGAAAAAAUCUGAUUU      | AAGUUGGAUUUGUUUUCCU     | Translation |
| <i>GhCSD4</i>  | novel_mir_1200 | 3           | 17.525 | 1     | 20  | 273    | 292  | CDS    | AGGAGAAAAAAUCUGAUUU      | AAGUUGGAUUUGUUUUCCU     | Translation |
| <i>GhCSD7</i>  | m0166          | 2.5         | 10.736 | 1     | 23  | 5577   | 5599 | CDS    | CAGAGUUGGUGUGUAGAGGAUAG  | UUGUCUUCUCCACACCAGCUUUG | Cleavage    |
|                | ghr-miR398     | 3           | 19.56  | 1     | 19  | 1058   | 1077 | CDS    | UGUUUAUCAGG-CACCCCU      | CGGGUGACCUGGGAAACA      | Cleavage    |
| <i>GhCSD8</i>  | novel_mir_2733 | 3           | 15.01  | 1     | 20  | 1257   | 1276 | CDS    | AAGAGAAAUGAUUGUAUGAA     | UCCGUGCAUUCAUUUCUCUU    | Cleavage    |
|                | ghr-miR398     | 3           | 19.56  | 1     | 19  | 1064   | 1083 | CDS    | UGUUUAUCAGG-CACCCCU      | CGGGUGACCUGGGAAACA      | Cleavage    |
| <i>GhCSD9</i>  | ghr-miR398     | 3           | 19.56  | 1     | 19  | 1223   | 1242 | CDS    | UGUUUAUCAGG-CACCCCU      | CGGGUGACCUGGGAAACA      | Cleavage    |
| <i>GhCSD10</i> | ghr-miR398     | 3           | 19.85  | 1     | 20  | 1076   | 1095 | CDS    | GUGUUUAUCAGG-CACCCCU     | CGGCTGACCTGGGAAACATA    | Cleavage    |
|                | novel_mir_1290 | 0.5         | 19.488 | 1     | 23  | 2042   | 2064 | CDS    | UUUGAUCUACGUAACAGAGACUA  | UAGUCUUUGUACGUUAGAUCAAA | Cleavage    |
|                | ghr-miR1324    | 3           | 9.176  | 1     | 21  | 2085   | 2105 | CDS    | UAGAAAUGGAUGGAAUUUUUA    | UUAAAAUUCAUCCAUUUAUA    | Cleavage    |
|                | novel_miR_47   | 2           | 11.588 | 1     | 21  | 2089   | 2109 | CDS    | ACAGUAGAAAUGGAUGGAAUU    | AAUUUCAUCCAUUUAUACUGU   | Cleavage    |
|                | novel_mir_4051 | 1.5         | 17.119 | 1     | 21  | 2169   | 2189 | CDS    | UUGUUAAAAGUUUCAUCCAUU    | AAUUGAUGAAAUUUUAAACAA   | Cleavage    |
|                | novel_miR_51   | 2.5         | 12.88  | 1     | 21  | 2195   | 2215 | CDS    | UUAGAUCAAAGAGCAAACCGG    | CCAGUUUACUCUUUGAUUUAA   | Cleavage    |
|                | ghr-miR7267    | 2           | 14.857 | 1     | 20  | 2203   | 2222 | CDS    | UUGUACGUUAGAUUAAAGAG     | CUCUUUGAUUUAAACGUGCAG   | Cleavage    |
|                | novel_mir_1378 | 2           | 18.99  | 1     | 22  | 2224   | 2245 | CDS    | UCAAAAAAUGGGCAAAGUAGUC   | GACUAAUUUGCUUUAUUUUUGA  | Cleavage    |
|                | novel_miR_50   | 2           | 21.463 | 1     | 21  | 2262   | 2282 | CDS    | UUGUACUAGGAGUCGGAUUGC    | GCAAUCCAUCUUAAGUACAA    | Cleavage    |
|                | ghr-miR414c    | 2           | 6.78   | 1     | 21  | 2831   | 2851 | CDS    | UCAUCAUCAUCAACCUUCA      | UGAAGAAGAUGAUGAUGAUGA   | Cleavage    |
| <i>GhFSD1</i>  | m0081          | 3           | 13.201 | 1     | 24  | 186    | 209  | CDS    | CAAGAUUUGGGUUUUGGGUUCGG  | CCAUGUCUAAAACCCAGGUUUUG | Cleavage    |
|                | novel_mir_1290 | 0.5         | 20.797 | 1     | 23  | 2021   | 2043 | CDS    | UUUGAUCUACGUAACAGAGACUA  | UAGUCUUUGUACGUUAGAUCAAA | Cleavage    |
|                | novel_mir_5016 | 0.5         | 16.137 | 1     | 21  | 2035   | 2055 | CDS    | ACCGAUUUGCUCUUUGAUCUA    | UAGAUCAAAAGCAAAUUGGU    | Cleavage    |
|                | novel_miR_47   | 3           | 11.628 | 1     | 21  | 2067   | 2087 | CDS    | ACAGUAGAAAUGGAUGGAAUU    | AAUUUCAUCCAUUUAUACUGA   | Cleavage    |
|                | novel_miR_51   | 1.5         | 13.577 | 1     | 21  | 2173   | 2193 | CDS    | UUAGAUCAAAGAGCAAACCGG    | CCAGUUUGCUCUUUGAUUUAA   | Cleavage    |
|                | novel_mir_1378 | 1           | 17.537 | 1     | 22  | 2202   | 2223 | CDS    | UCAAAAAAUGGGCAAAGUAGUC   | GACUAAUUUGCCAUUUUUUGA   | Cleavage    |
|                | novel_miR_50   | 2           | 21.389 | 1     | 21  | 2240   | 2260 | CDS    | UUGUACUAGGAGUCGGAUUGC    | GCAAUCCAUCUUAAGUACAA    | Cleavage    |
|                | novel_mir_4246 | 1           | 18.955 | 1     | 21  | 1029   | 1049 | CDS    | UUUUAACUCUGCCAAGCAAU     | AUUGCUUGGUAGGGUUGAAAA   | Cleavage    |
|                | m0362          | 3           | 6.177  | 1     | 24  | 1191   | 1214 | CDS    | AAGUGUGCUUGGUAGGAAAGAUAA | UUUUCUUAUACCAAGCACACUC  | Cleavage    |
|                | novel_mir_4246 | 1           | 19.404 | 1     | 21  | 1029   | 1049 | CDS    | UUUUAACUCUGCCAAGCAAU     | AUUGCUUGGUAGGGUUGAAAA   | Cleavage    |
| <i>GhFSD2</i>  | m0362          | 2           | 6.266  | 1     | 24  | 1191   | 1214 | CDS    | AAGUGUGCUUGGUAGGAAAGAUAA | UUUUCUUAUACCAAGCACACUC  | Cleavage    |
| <i>GhMSD1</i>  | ghr-miR3       | 2.5         | 16.915 | 1     | 20  | 2045   | 2064 | CDS    | UCUUGUACUGCAUCAUAACU     | UAUUUUGGUGCAGUACAAGA    | Cleavage    |
| <i>GhMSD2</i>  | ghr-miR3       | 2.5         | 15.124 | 1     | 20  | 2055   | 2074 | CDS    | UCUUGUACUGCAUCAUAACU     | UAUUUUGGUGCAGUACAAGA    | Cleavage    |
| <i>GhMSD3</i>  | ghr-miR3       | 2.5         | 15.687 | 1     | 20  | 2655   | 2674 | CDS    | UCUUGUACUGCAUCAUAACU     | UUUUUUGGUGCAGUACAAGA    | Cleavage    |
| <i>GhMSD4</i>  | ghr-miR3       | 2.5         | 18.554 | 1     | 20  | 2641   | 2660 | CDS    | UCUUGUACUGCAUCAUAACU     | UUUUUUGGUGCAGUACAAGA    | Cleavage    |
| <i>GhCCS1</i>  | ghr-miR398     | 3           | 14.26  | 1     | 20  | 2632   | 2650 | CDS    | UGUGUUCUCAGGUCACCCCU     | AUUGGCGACCUGGGAACUCA    | Cleavage    |
|                | novel_mir_1205 | 2           | 3.515  | 1     | 23  | 5001   | 5021 | 3' UTR | AGAGGGAGAGCAGAAGAGAAUA   | UUUUCUCUUCUUCUUCUUCUUCU | Cleavage    |
| <i>GhCCS2</i>  | ghr-miR398     | 3           | 14.34  | 1     | 20  | 2504   | 2523 | CDS    | UGUGUUCUCAGGUCACCC-CU    | AGUUGGCGACCUGGGAACUCA   | Cleavage    |
|                | novel_mir_1205 | 2           | 2.894  | 1     | 23  | 4734   | 4756 | 3' UTR | AGAGGGAGAGCAGAAGAGAAUA   | UUUUCUCUUCUUCUUCUUCUUCU | Cleavage    |
