# Supplementary material for: Genome-wide characterization and expression analyses of superoxide dismutase (SOD) genes in Gossypium hirsutum
Source: PubMed Central journal article supplement (PMC5429560; doi:10.1186/s12864-017-3768-5), 2017-05-12
Supplement: 12864_2017_3768_MOESM3_ESM.pdf [file 12864_2017_3768_MOESM3_ESM.pdf]

**Additional file 3: Table S7.** The details of whole transcriptome sequencing data of *G. hirsutum* acc. TM-1.

| Classification                           | Accession                                         | Description                                                      |
|------------------------------------------|---------------------------------------------------|------------------------------------------------------------------|
| stress-induced expression pattern        | SRX849553                                         | Gossypium hirsutum cv TM1 cotton RNA-seq, 1 h treated with PEG   |
|                                          | SRX849554                                         | Gossypium hirsutum cv TM1 cotton RNA-seq, 3 h treated with PEG   |
|                                          | SRX849555                                         | Gossypium hirsutum cv TM1 cotton RNA-seq, 6 h treated with PEG   |
|                                          | SRX849556                                         | Gossypium hirsutum cv TM1 cotton RNA-seq, 12 h treated with PEG  |
|                                          | SRX849549                                         | Gossypium hirsutum cv TM1 cotton RNA-seq, 1 h treated with salt  |
|                                          | SRX849550                                         | Gossypium hirsutum cv TM1 cotton RNA-seq, 3 h treated with salt  |
|                                          | SRX849551                                         | Gossypium hirsutum cv TM1 cotton RNA-seq, 6 h treated with salt  |
|                                          | SRX849552                                         | Gossypium hirsutum cv TM1 cotton RNA-seq, 12 h treated with salt |
|                                          | SRX849545                                         | Gossypium hirsutum cv TM1 cotton RNA-seq, 1 h treated with hot   |
|                                          | SRX849546                                         | Gossypium hirsutum cv TM1 cotton RNA-seq, 3 h treated with hot   |
|                                          | SRX849547                                         | Gossypium hirsutum cv TM1 cotton RNA-seq, 6 h treated with hot   |
|                                          | SRX849548                                         | Gossypium hirsutum cv TM1 cotton RNA-seq, 12 h treated with hot  |
|                                          | SRX849541                                         | Gossypium hirsutum cv TM1 cotton RNA-seq, 1 h treated with cold  |
|                                          | SRX849542                                         | Gossypium hirsutum cv TM1 cotton RNA-seq, 3 h treated with cold  |
|                                          | SRX849543                                         | Gossypium hirsutum cv TM1 cotton RNA-seq, 6 h treated with cold  |
|                                          | SRX849544                                         | Gossypium hirsutum cv TM1 cotton RNA-seq, 12 h treated with cold |
|                                          | SRX849557                                         | Gossypium hirsutum cv TM1 cotton RNA-seq, 0 h CK                 |
|                                          | SRX849558                                         | Gossypium hirsutum cv TM1 cotton RNA-seq, 1 h CK                 |
|                                          | SRX849559                                         | Gossypium hirsutum cv TM1 cotton RNA-seq, 3 h CK                 |
|                                          | SRX849560                                         | Gossypium hirsutum cv TM1 cotton RNA-seq, 6 h CK                 |
| SRX849561                                | Gossypium hirsutum cv TM1 cotton RNA-seq, 12 h CK |                                                                  |
| tissue/organ-specific expression pattern | SRX797899                                         | Gossypium hirsutum cv TM1 cotton RNA-seq, root                   |
|                                          | SRX797900                                         | Gossypium hirsutum cv TM1 cotton RNA-seq, stem                   |
|                                          | SRX797901                                         | Gossypium hirsutum cv TM1 cotton RNA-seq, leaf                   |
|                                          | SRX797902                                         | Gossypium hirsutum cv TM1 cotton RNA-seq, torus                  |
|                                          | SRX797903                                         | Gossypium hirsutum cv TM1 cotton RNA-seq, petal                  |
|                                          | SRX797904                                         | Gossypium hirsutum cv TM1 cotton RNA-seq, stamen                 |
|                                          | SRX797905                                         | Gossypium hirsutum cv TM1 cotton RNA-seq, pistil                 |
|                                          | SRX797906                                         | Gossypium hirsutum cv TM1 cotton RNA-seq, calycle                |

| <b>Classification</b>                    | <b>Accession</b>                                      | <b>Description</b>                                       |
|------------------------------------------|-------------------------------------------------------|----------------------------------------------------------|
| <b>stage-specific expression pattern</b> | SRX797886                                             | Gossypium hirsutum cv TM1 cotton RNA-seq, 0h seed        |
|                                          | SRX797887                                             | Gossypium hirsutum cv TM1 cotton RNA-seq, 5h seed        |
|                                          | SRX797888                                             | Gossypium hirsutum cv TM1 cotton RNA-seq, 10h seed       |
|                                          | SRX797889                                             | Gossypium hirsutum cv TM1 cotton RNA-seq, 24h cotyledon  |
|                                          | SRX797890                                             | Gossypium hirsutum cv TM1 cotton RNA-seq, 48h cotyledon  |
|                                          | SRX797891                                             | Gossypium hirsutum cv TM1 cotton RNA-seq, 72h cotyledon  |
|                                          | SRX797892                                             | Gossypium hirsutum cv TM1 cotton RNA-seq, 96h cotyledon  |
|                                          | SRX797893                                             | Gossypium hirsutum cv TM1 cotton RNA-seq, 120h cotyledon |
|                                          | SRX797894                                             | Gossypium hirsutum cv TM1 cotton RNA-seq, 24h root       |
|                                          | SRX797895                                             | Gossypium hirsutum cv TM1 cotton RNA-seq, 48h root       |
|                                          | SRX797896                                             | Gossypium hirsutum cv TM1 cotton RNA-seq, 72h root       |
|                                          | SRX797897                                             | Gossypium hirsutum cv TM1 cotton RNA-seq, 96h root       |
|                                          | SRX797898                                             | Gossypium hirsutum cv TM1 cotton RNA-seq, 120h root      |
|                                          | SRX797907                                             | Gossypium hirsutum cv TM1 cotton RNA-seq, -3dpa ovule    |
|                                          | SRX797908                                             | Gossypium hirsutum cv TM1 cotton RNA-seq, -1dpa ovule    |
|                                          | SRX797909                                             | Gossypium hirsutum cv TM1 cotton RNA-seq, 0dpa ovule     |
|                                          | SRX797910                                             | Gossypium hirsutum cv TM1 cotton RNA-seq, 1dpa ovule     |
|                                          | SRX797911                                             | Gossypium hirsutum cv TM1 cotton RNA-seq, 3dpa ovule     |
|                                          | SRX797912                                             | Gossypium hirsutum cv TM1 cotton RNA-seq, 5dpa ovule     |
|                                          | SRX797913                                             | Gossypium hirsutum cv TM1 cotton RNA-seq, 10dpa ovule    |
|                                          | SRX797914                                             | Gossypium hirsutum cv TM1 cotton RNA-seq, 20dpa ovule    |
|                                          | SRX797915                                             | Gossypium hirsutum cv TM1 cotton RNA-seq, 25dpa ovule    |
|                                          | SRX797916                                             | Gossypium hirsutum cv TM1 cotton RNA-seq, 35dpa ovule    |
|                                          | SRX797917                                             | Gossypium hirsutum cv TM1 cotton RNA-seq, 5dpa fiber     |
|                                          | SRX797918                                             | Gossypium hirsutum cv TM1 cotton RNA-seq, 10dpa fiber    |
|                                          | SRX797919                                             | Gossypium hirsutum cv TM1 cotton RNA-seq, 20dpa fiber    |
| SRX797920                                | Gossypium hirsutum cv TM1 cotton RNA-seq, 25dpa fiber |                                                          |

These data that the study accession was SRP044705 were obtained from the NCBI Sequence Read Archive (SRA) (<http://www.ncbi.nlm.nih.gov/sra>)
