# Supplementary material for: Genome-wide characterization and expression analyses of superoxide dismutase (SOD) genes in Gossypium hirsutum
Source: PubMed Central journal article supplement (PMC5429560; doi:10.1186/s12864-017-3768-5), 2017-05-12
Supplement: 12864_2017_3768_MOESM4_ESM.pdf [file 12864_2017_3768_MOESM4_ESM.pdf]

**Additional file 4: Table S8.** Gene-specific primers used for quantitative real-time PCR.

| Gene name          |         | Primer<br>(5'-3')        | Length | T <sub>m</sub><br>/°C | Amplicon<br>/bp |
|--------------------|---------|--------------------------|--------|-----------------------|-----------------|
| <i>GhUBQ7</i>      | Forward | AGAGGTCGAGTCTTCGGACA     | 20     | 60.0                  | 102             |
|                    | Reverse | GCTTGATCTTCTTGGGCTTG     | 19     |                       |                 |
| <i>Gh_A13G0817</i> | Forward | ATGGCTCTGCGAGTTTC        | 17     | 60.0                  | 90              |
|                    | Reverse | CAGCAAGGACAACGACC        | 17     |                       |                 |
| <i>Gh_D13G1062</i> | Forward | ATGGCTCTGCGAGTTTCT       | 18     | 60.0                  | 91              |
|                    | Reverse | TCAGCAAGGACAACGACA       | 18     |                       |                 |
| <i>Gh_A13G1450</i> | Forward | TGGGGACACAACCTAACGGGTA   | 21     | 60.0                  | 129             |
|                    | Reverse | CCATCAACACCAACAGTGACATTC | 24     |                       |                 |
| <i>Gh_D13G1747</i> | Forward | GGGGACATAACTAACGGGTGC    | 21     | 60.0                  | 89              |
|                    | Reverse | TGGCGGTTCTCATCTTCG       | 18     |                       |                 |
| <i>Gh_A09G2473</i> | Forward | CTCCCTTGCTGCTACTATTC     | 20     | 60.0                  | 142             |
|                    | Reverse | ATTCACAGTTGTAAGACCATCAT  | 24     |                       |                 |
| <i>Gh_D09G0858</i> | Forward | GGAAGTTGAAGGCGTTG        | 17     | 60.0                  | 167             |
|                    | Reverse | TATTGTTAGGATTGAAATGTGG   | 22     |                       |                 |
| <i>Gh_A05G0722</i> | Forward | CTTACTCCAGGGCTTCACGG     | 20     | 60.0                  | 157             |
|                    | Reverse | TAGCAACTATGTTTCCCAGGTCAC | 24     |                       |                 |
| <i>Gh_D05G0857</i> | Forward | TACTCCAGGGCTTCACGG       | 18     | 60.0                  | 158             |
|                    | Reverse | CAACTATGTTTCCCAGGTCAG    | 21     |                       |                 |
| <i>Gh_A11G2096</i> | Forward | CCACTTAGCGGAGAGCA        | 17     | 60.0                  | 113             |
|                    | Reverse | GCACCTTCATTCCCTGTC       | 18     |                       |                 |
| <i>Gh_D11G2412</i> | Forward | CCACTTAGCCGACAGCATT      | 19     | 60.0                  | 127             |
|                    | Reverse | CACATCCGACTCTTACACCG     | 20     |                       |                 |
| <i>Gh_A10G1595</i> | Forward | ACCTTGCCCCTATTCGTG       | 18     | 60.0                  | 89              |
|                    | Reverse | TGATTCCAATGAACCAAAGTGTG  | 23     |                       |                 |
| <i>Gh_D10G1852</i> | Forward | AAGAACCGTGCCCCTAT        | 17     | 60.0                  | 92              |
|                    | Reverse | GATTCCAATGAACCAAAGTGA    | 21     |                       |                 |
| <i>Gh_A05G2383</i> | Forward | AGCCTCGACATGGTTCTTTGGGTT | 23     | 60.0                  | 102             |
|                    | Reverse | AGCCTTGTAAGCAGCACCCTCA   | 22     |                       |                 |
| <i>Gh_D05G2648</i> | Forward | CTCCATAACGCTATCCAGAAAGG  | 23     | 60.0                  | 139             |
|                    | Reverse | GCTCACCTCCTCCTTCACTAATA  | 23     |                       |                 |
| <i>Gh_A07G0392</i> | Forward | GCCATCAGAGAAGGATAAAA     | 20     | 60.0                  | 105             |
|                    | Reverse | TGCTCCCAGACATCAATAGTA    | 21     |                       |                 |
| <i>Gh_D07G0457</i> | Forward | GCCATCAGAGAAGGCTAAAG     | 20     | 60.0                  | 103             |
|                    | Reverse | CTCCCAGACATCAATCGTG      | 19     |                       |                 |
| <i>Gh_A13G0530</i> | Forward | AGGTGTGGAACCGTGACTT      | 19     | 60.0                  | 107             |
|                    | Reverse | TGTGAATGACCCAAAATCC      | 19     |                       |                 |
| <i>Gh_D13G0600</i> | Forward | GCTCTGGCTGGGTTTGG        | 17     | 60.0                  | 157             |
|                    | Reverse | CTCGCTTTGTCTGTTCTGC      | 18     |                       |                 |
