# Supplementary material for: Genome-wide characterization and expression analyses of superoxide dismutase (SOD) genes in Gossypium hirsutum
Source: PubMed Central journal article supplement (PMC5429560; doi:10.1186/s12864-017-3768-5), 2017-05-12
Supplement: 12864_2017_3768_MOESM5_ESM.pdf [file 12864_2017_3768_MOESM5_ESM.pdf]

**Additional file 5: Figure S1.** The alignment of the genome sequence and mRNA sequence of *GhCSD7* ([Gh\\_A09G2473](#)) with *GhCSD8* ([Gh\\_D09G0858](#)) and its downstream 5000bp (D09: 33604208.. 33609208 -). The multiple alignment was obtained using ClustalW and conserved amino acids were shaded using Boxshade sever (v.3.21) (<http://sourceforge.net/projects/boxshade/>). Dashes (-) indicated gaps in the alignment. The rectangle filled blue represented the GhCSD7, the rectangle filled red represented the C2H2-type zinc finger protein.

|                  |     |                                                               |                               |
|------------------|-----|---------------------------------------------------------------|-------------------------------|
| Gh_D09G0858      | 1   | TGGTCTTACTCCTGGGCCTCATGGCTTCCACCTGATGGCTGCCCATATTTTCA         | TGACAAC                       |
| Gh_A09G2473_mRNA | 1   | -----ATGGCTGCCCATATTTT                                        | CACGACAAC                     |
| Gh_A09G2473      | 1   | TGGTCTTACTCCTGGGCCTCATGGCTTCCACCTA                            | ATGGCTGCCCATATTTT             |
| Gh_D09G0858      | 61  | CCCATCCCACCTCGCTCTCTCTTTTCCATCCTCAACTAACCCTTCAAACCCACCGTTCT   |                               |
| Gh_A09G2473_mRNA | 27  | CCCGTCCCACCTCGCTCTCTCTTTTCCATCCTCAACTAACCCTTCAAACCCACCGTTCT   |                               |
| Gh_A09G2473      | 61  | CCCGTCCCACCTCGCTCTCTCTTTTCCATCCTCAACTAACCCTTCAAACCCACCGTTCT   |                               |
| Gh_D09G0858      | 121 | TCTCTCCTCATTTTCGTGGGGTCTCTCTTAAGCTCCCTCGTCAATCCCTCTCCCTTGCTGC |                               |
| Gh_A09G2473_mRNA | 87  | TCTCTCCTCATTTTCGTGGGGTCTCTCTTAAGCTCCCTCGTCAATCCCTCTCCCTTGCTGC |                               |
| Gh_A09G2473      | 121 | TCTCTCCTCATTTTCGTGGGGTCTCTCTTAAGCTCCCTCGTCAATCCCTCTCCCTTGCTGC |                               |
| Gh_D09G0858      | 181 | CACTATTCCCAAGAAGCCCTTTTCTGTGTTTGCTGTTACCAAGAAAGCTGTCGCTGTTCT  |                               |
| Gh_A09G2473_mRNA | 147 | TACTATTCCCAAGAAGCCCTTTTCTGTGTTTGCTGTTACCAAGAAAGCTGTCGCTGTTCT  |                               |
| Gh_A09G2473      | 181 | TACTATTCCCAAGAAGCCCTTTTCTGTGTTTGCTGTTACCAAGAAAGCTGTCGCTGTTCT  |                               |
| Gh_D09G0858      | 241 | TAAAGGCAATTTCGGAAGTTGAAGGCGTTGTCACGTTGACCCAGGAAAC             | TGATGGTTGACC                  |
| Gh_A09G2473_mRNA | 207 | TAAAGGTAATTTCGGAAGTTGAAGGCGTTGTCACGTTGACCCAGGAAAATGATGGTCCG   | ---                           |
| Gh_A09G2473      | 241 | TAAAGGTAATTTCGGAAGTTGAAGGCGTTGTCACGTTGACCCAGGAAAATGATGGGGAA   | ---                           |
| Gh_D09G0858      | 301 | CAGGAAACTGATGGTTTCTGTTTTGCCCCC                                | CCCCCTCTTTTTATCATT            |
| Gh_A09G2473_mRNA | 265 | -----TGTTTTGCCCCC                                             | -----TCTTTTTATCATT            |
| Gh_A09G2473      | 299 | -----GGGTTGATATGC                                             | -----AAGCTCAAGCTGTAATTTGTGGG  |
| Gh_D09G0858      | 361 | TCTAATGCATTTTGTGATTTGGGTTTTTTTTT                              | -CTTCTAGTGGGGAAATTTTGATTCTTTG |
| Gh_A09G2473_mRNA | 302 | TCTAATGCATTTTGTGATTTGGGTTTTTTTTT                              | TCTTCTAGTGGGGAAATTTTGATTCTTTG |
| Gh_A09G2473      | 335 | TCTGAT---CATCATCATCAAGAAGCCTTGATCATGAAAGGCAAGCGTACCAAGCGCCAA  |                               |
| Gh_D09G0858      | 420 | GGATTTCTTGTGTTTTTGAAGGATAAGAAGCCAAAGAAATGAAATGGGTACATTTTG     |                               |
| Gh_A09G2473_mRNA | 362 | GGATTTCTTGTGTTTTTGAAGGATAAGAAGCCAAAGAAATGAAATGGGTACATTTTG     |                               |
| Gh_A09G2473      | 392 | AGATCGCCATCCCTGTTTTGCTCTCCGCTGACTTCGAGCTCATCAAATGG-----TG     |                               |
| Gh_D09G0858      | 480 | CTTTTTGGGGTTTTTCTTATTGACGAATTTAATTCCAAGTTTGATACTTTAAGATTTGAT  |                               |
| Gh_A09G2473_mRNA | 422 | CTGTTTGGGGTTTTTCTTATTGACGAATTTAATTCCAAGTTTGATACTTTAAGATTTGAT  |                               |
| Gh_A09G2473      | 444 | GTGATGGAG-----TGGTGGAGGAATAAATCTGATTTCTTCTCCGATGACATCCGAT     |                               |
| Gh_D09G0858      | 540 | TGAATCTTGTACAATTAGGGTGTATTAATTTTTT                            | TAAATTTTGATGCCCAGAACATATTTAA  |
| Gh_A09G2473_mRNA | 482 | TGAATCTTGTACAATTAGGGTGTATTAATTTTTT                            | TAAATTTTGATGCCCAGAACATATTTAA  |
| Gh_A09G2473      | 497 | -GAGATTTACCAGAGCACCGACGAAGAGAGGAGATGGCTAATGCTAATCATGTT---     |                               |
| Gh_D09G0858      | 600 | GGAAATAAAGTCATTGTGGAAGTACTTAACATGTTCTTTCTTTG                  | GCTGTTTAAACATGGA              |
| Gh_A09G2473_mRNA | 542 | GGAAATAAAGTCATTGTGGAAGTACTTAACATGTTCTTTCTTTG                  | GCTGTTTAAACATGGA              |
| Gh_A09G2473      | 553 | -GCCACAAAGTGATGGT-----CCCAAAAGGAGTACTGTTGAAGCGAAATTC AAGATAGC |                               |

Gh\_D09G0858 660 AACTAA-ATGAAAAAATGTTAGCTTGTAGTTCTCTTATCTTTTTGGCAATCAAATGTTAG  
Gh\_A09G2473\_mRNA 602 AACTAA-ATGAAAAAATGTTAGCTTGTAGTTCTCTTATCTTTTTGGCAATCAAATTTT-G  
Gh\_A09G2473 607 TACTAAGACAAAACAAGGTTGAGCTT-----TATGTCCACGAGTGTAAAACTT---

Gh\_D09G0858 719 TATCATCTGGGAATGCTTATTTGTTCTGTGGATGAATAGGTCCTACAACGTGAATGTTCT  
Gh\_A09G2473\_mRNA 660 TATCATCTGGGAATGCTTATTTGTTCTGTGGATGAATAGGTCCTACAACGTGAATGTTCT  
Gh\_A09G2473 654 -GTAACC--GGTCTTTCCCTTCGTTCCAAGCACTAGGAGGCCATATGGCAAGCCACAAGA

Gh\_D09G0858 779 GAATTACTGGTCTTACTCCTGGGCCTCATGGCTTCCACCTG GTGAGTGTTTTCGGCTTTA  
Gh\_A09G2473\_mRNA 720 GAATTACTGGTCTTACTCCTGGGCCTCATGGCTTCCACCTAGT GAGTGTTTTCGGCTT-A  
Gh\_A09G2473 711 AGCCTAAAGGCGCCATTGCAAGC-----AGAAAAGACCACTAGTTT---

Gh\_D09G0858 839 GCTGCTTGTGTTAGTGGATTTGAGTGCATAAAAAGTTCTCCGAACAATATGATTTTAATC  
Gh\_A09G2473\_mRNA 779 GCTGCTTGTGTTAGTGGATTTGAGCGCATAAAAAGTTCTCCGAACAATATGATTTTAATC  
Gh\_A09G2473 753 --TGGCAGTTAATGATGCAGTC-ATTGCTTTACGAGTAAGCAACAAAAAGGGTAATAAAA

Gh\_D09G0858 899 TTCCTTTTCGTTTCTTGTGTAGCATGAGTATGGTGACACAACAAATGGGTGCATGTCAAC  
Gh\_A09G2473\_mRNA 839 TTCCTTTTCGTTTCTTGTGTAGCATGAGTATGGTGACACAACGAATGGGTGCATGTCTAC  
Gh\_A09G2473 810 TTCACGAGTGTCAATCTGTGGCTCGGAATTCACGTC CGTCAAGCCCTCGGAGGTCAACA

Gh\_D09G0858 959 AGGTATAACTTAGTGCATTTGAATCAAATGACGTGCGTTC TTATTGCGTTTCAGITCATE  
Gh\_A09G2473\_mRNA 899 AGGTATAACTTAGTGCCTTTGAATCAAATGATGTGCGTTC TTATTGCGATTTAGGTCATE  
Gh\_A09G2473 870 TGAGAAGGCATAGGACAGCATCAGCACCTGCTGCAAGCAACCAAGATG-----CCATG

Gh\_D09G0858 1019 TATGCACAAGATCCTTATTTTTTAAAATTTTAAATGACAGGAC CACATTTCAATCCTAACA  
Gh\_A09G2473\_mRNA 959 TATGTATAAGTCTCTTATTTTTAAAATTTTTAAATGACAGGAG CACATTTCAATCCTAACA  
Gh\_A09G2473 923 AATGGCAATGAT----CACATCAAGCCTAGSAATA TTA----CGCCTTTGGATCTTAATC

Gh\_D09G0858 1079 ATATGACACATGGTGTCTCTGAGGATGAAGTACGCCATGCGGGTGACCTGGGAAACATAA  
Gh\_A09G2473\_mRNA 1019 ATATGACACATGGTGTCTCTGAGGATGAAGTACGCCATGCGGGTGACCTGGGAAACATAA  
Gh\_A09G2473 975 TTCTTGCACCTGAAGAT---GATGTTAGAG-ATTCCATGTTCTG-AATTGGAAACACC---

Gh\_D09G0858 1139 TTGCTAATGCTGATGGTAATACATTCTTAATTTTTTTTTTTTCTT TTTTAAATTTTCTGT  
Gh\_A09G2473\_mRNA 1079 TTGCTAATGCTGATGGTAATACATTCTTAATTTTTTTTTTTTCTTATTTTAAATTTGTCTAT  
Gh\_A09G2473 1027 ---CCAAC----AAGCTATTGCTTCTCCACACCAGCTTTGGTAGATTGCCATTA-CTAA

Gh\_D09G0858 1199 GCACCAATTAAC TTTATTCATTGCCTATGTTTGTAATGCAGGAGTGGCAGAGGCAACAA  
Gh\_A09G2473\_mRNA 1139 GCACCAATTAAC TTTATTCATTGCCTATGTTCTGGTAATGCAGGAGTGGCAGAGGCAACAA  
Gh\_A09G2473 1079 GTCGACATGAAC TTAGTCTAACCACCTGGAAATGCTGGCGGAAGATTGGCATGTGATACCA

Gh\_D09G0858 1259 TTGTG-GACAATCAGGTGATGTTTAAATAACTCGTGTTCCTTTCTGTGCAAATCTCCGTGC  
Gh\_A09G2473\_mRNA 1199 TTGTG-GACAATCAGGTGATGTTCAATAACTCGTGTTCCTTTCTGTGCAAATCTCTGTGC  
Gh\_A09G2473 1139 CTAAC TGGCCCCAATGCGTTGTTGGAAGAGCATTTGTGGTTTC---ATCAGCTTGAGGAT

Gh\_D09G0858 1318 ATTCATTT-CTCTTATGTGTCTGCATGAATAATTTCCCTTTTCAATGTGATCCTGTATAC  
Gh\_A09G2473\_mRNA 1258 ATTCATTTTCTCTTATGTGTCTGCATGAATAATTTCCCTTTTCAATGTGATCCAGTATAC  
Gh\_A09G2473 1196 GATC-TTGAAAAGGAGTGGCAGAGGCAACAATTGT-----GGACAATCAGGAGCAC

Gh\_D09G0858 1377 TTTCTCAGTTGCTAAACTATGACTCTCTTGTGCAGATACCACTAAGTGGCCCCAATGCGG  
Gh\_A09G2473\_mRNA 1318 TTTCTCAGTTGCTAAACTATGACTCTCTTGTGCAGATACCACTAAGTGGCCCCAATGCGG  
Gh\_A09G2473 1247 ATT-TCAATCCTAACAAATATGACACA-TGGTGCTCCTGAGGATGAAGTACGCCA-TGCGG

|                  |      |                                                                 |
|------------------|------|-----------------------------------------------------------------|
| Gh_D09G0858      | 1437 | TTG---TTGGAAGAGCATTGTGGTTCATGA-GCTTGAGGATGATCTTGAAAGGGTAAT      |
| Gh_A09G2473_mRNA | 1378 | TTG---TTGGAAGAGCATTGTGGTTCATGA-GCTTGAGGATGATCTTGAAAGGGTAAT      |
| Gh_A09G2473      | 1304 | GTGACCTGGGAAACATAATTGCTAATGCTGATGCATGAGTATGGTGACACAACGAATGGG    |
| Gh_D09G0858      | 1493 | TATTTGGCTTGCAATTCTAGCAGCTGCTTTAGTAGGAAACTTACCTCAAAGTTGCAGAG     |
| Gh_A09G2473_mRNA | 1434 | TATTTGGCTTGCAATTCTAGCAGTTGCTTTAGTAGGAAACTTCCCTCAAAGTTGCAGAG     |
| Gh_A09G2473      | 1364 | TGCATGTCT-ACAGGTCCTACAACCTGTGAATGTTTCAATTACTGGTCTTACTCCTGGGCC   |
| Gh_D09G0858      | 1553 | GGAAGAGTGATGTG-AGTGGCTATTTACTTCTTAGTTTTATTTTTCTTATATTTTTGTTT    |
| Gh_A09G2473_mRNA | 1494 | GGAAGAGTGACGTGTAGTGGCTATTTACTTCTTAGTTTTATTTTTCTTATATTTTTGTTT    |
| Gh_A09G2473      | 1423 | TCATGCCCTTCCACCCTAATGGCTGCCCATATTTTCAACGACAACCCCGTCCCACCTC----- |
| Gh_D09G0858      | 1612 | GGTCATGCATTTGCAGGTGGACATGAACCTTAGTCTAACCACTGGGAATGCTGGCGGAAGA   |
| Gh_A09G2473_mRNA | 1554 | GGTCATGCATTTGCAGGTGGACATGAACCTTAGTCTAACCACTGGGAATGCTGGCGGAAGA   |
| Gh_A09G2473      | 1478 | GCTCTCTCTTTTCCATCCTCA-ACTAACCCCTTCAAACCCACCGGTTCTTCTCTCCTCATT   |
| Gh_D09G0858      | 1672 | TTGGCATGTGGTATGTACATGTGTACTTTTTATCTACATGCT-----                 |
| Gh_A09G2473_mRNA | 1614 | TTGGCATGTGGTATGTACATGTGTACTTTTTATCTACATGCTTATATGTTTCCAGAACAGA   |
| Gh_A09G2473      | 1537 | TCC---TGGGTCTCT-CTTAAGCTCCCTCGTCAAATCCCTC-----                  |
| Gh_D09G0858      | 1713 | -----ACATTTTCCAGACTCTCATCTCTGGTTTCCTTTTCTTGCATCTA-TG            |
| Gh_A09G2473_mRNA | 1674 | CATGAAATTCATTACATTTTCCAGACTC--ATCTCTGGTTGC-TTTTCTTGCATCTA-TG    |
| Gh_A09G2473      | 1574 | -----TCCCTTGGCTGCTACTATTCCCAAGAAGCCCTTTTCTGTGTTTGGCTG           |
| Gh_D09G0858      | 1759 | TTTTGAGCAGAATCATCTTTAG-CCTGATTATTATAGTTAAGCAAAAAGCACATTAGTAA    |
| Gh_A09G2473_mRNA | 1730 | TTTTGAGCAGAATCATCTTTAG-CCTGATTATTATAGTTAAGCAAAAAGCACATTAGTAA    |
| Gh_A09G2473      | 1620 | TTACCAAGAAAGCTCTCGCTGTTCTTAAAGGTAATTCGGAAGTTGAAGGCG--TTGTCAC    |
| Gh_D09G0858      | 1818 | CTTGAAGAATGCTGCAGCTTGTGTACCAGTTTTCTATAGCCTTCAGTTTGTGTTTGT       |
| Gh_A09G2473_mRNA | 1789 | CTTGAAGAATGCTGCAGCTTGTGTACCATTTTTCTATAGCCTTCAGTTTGTGTTTGT       |
| Gh_A09G2473      | 1678 | GTTGACCCAGGAAATGATGGGAAGGGTTGATATGCAAGCTCAAGCT-GTATTTGTGG       |
| Gh_D09G0858      | 1878 | TTTTTGTTCACTTTCATTGTCTCAGCTCAAGCCTTGATTTTGCTTGCGGGGATGATTCTGT   |
| Gh_A09G2473_mRNA | 1849 | TTTTTGTTCACTTTCATTGGCTCAGCTCAAGCCTTGAATTTGCTCAGGGGGATGATTCTGT   |
| Gh_A09G2473      | 1737 | GGTCTGATCA--TCATCATCAAG----AAGCCTTGATCATGAAAGGCAAGCGTACCAAGC    |
| Gh_D09G0858      | 1938 | GTTTGAT----TCAAACCTTTTCTCGAAACCTGACAAAATTAAATCTTTAGTATATTAGAT   |
| Gh_A09G2473_mRNA | 1909 | GTTTGAT----TCAAACCTTTTCTCGAGACCTCACAAAATTAAATCTGTAGTATATTAGAT   |
| Gh_A09G2473      | 1791 | GCCAAAGATCGCCATCCCTGTTTGGTGTGCGGCTGACTTCGAGCTCATCAAATGGTGG--    |
| Gh_D09G0858      | 1994 | CCTTCAGCTTGATGCAATTCATTCATTCAATTTGTATGTATGTTTGGAGGGAGGGGATTT    |
| Gh_A09G2473_mRNA | 1965 | CCTTCAGCTTGATGCAATTCATTTATTCATTGTATGTATGTTTGGAGGGAGGGGATTT      |
| Gh_A09G2473      | 1849 | -TGATCGAGTGTGAGGAAATATAACTCGATTTCTTCTCCGATGACATCCGATGAGATTT     |
| Gh_D09G0858      | 2054 | AAAAGGCCATGGGTAGGACAAGGACAGATAGGTTTAAAGGTTTGGATATATTTGCAGCCTC   |
| Gh_A09G2473_mRNA | 2025 | AAAAGGCCATGGGTAGGACAAGGACAGATAGGTTTAAAGGTTTGGATATATTTGCAGCCTC   |
| Gh_A09G2473      | 1908 | ACGAGAGCACCGA-GGAAGAAGAGGAGAT-GGCTAATTCCTTAATCATGTTGGCAC----    |
| Gh_D09G0858      | 2114 | TTAAGACTGATAACCCATCTCAGATGGACCCTTGAACGT---TTTGAAATACTTG-TGCA    |
| Gh_A09G2473_mRNA | 2085 | TTAGGACTGATAATCCATCTCAGATGGACCCTTGAACGT---TTTGAAATACTTG-TGCA    |
| Gh_A09G2473      | 1962 | ---AAAAGTGAATGGTCC-CAAAAGGAGTACTGTTGAAGCGAAATTCAGATAGCTACTAAG   |

|                  |      |                                   |                                                             |
|------------------|------|-----------------------------------|-------------------------------------------------------------|
| Gh_D09G0858      | 2170 | TTGACTATGGCTTGGCAATGAA            | CATGGTGGTGTACGTATCTATCTTCTTTTTGTTGGACA                      |
| Gh_A09G2473_mRNA | 2141 | TTGACTATGGCTTGGCAATGAT            | CATGGTGGTGTACGTATCTATCTTCTTTTTGTTGGACA                      |
| Gh_A09G2473      | 2018 | ACAAACAAGGGTGA                    | GCTTTATGTCCACGAGTGTA-AAACTTGTAAACCGGTCTTTC--CCT             |
| Gh_D09G0858      | 2230 | TAGTTTTGTCAATTCTGCGTTCCGTTT       | GAGACGGACTAAGTTATCTTTAGTCC                                  |
| Gh_A09G2473_mRNA | 2201 | TAGTTTTGTCAATTCTGCT               | GTTCCGTTT                                                   |
| Gh_A09G2473      | 2075 | TCCACTAGGAGGCCATATG               | CAAGCCACAAGAAGCCCTAAAGGCGCCATTG                             |
| Gh_D09G0858      | 2290 | TTTGATGTCTATGCGAATGTTCTTTTCC      | CACATAAACATCCTATT                                           |
| Gh_A09G2473_mRNA | 2261 | TTTGATGTCTATGCGAATGTTCTTTTCC      | CACATAAACATATATTATT                                         |
| Gh_A09G2473      | 2133 | CAGACCA                           | GAAAAGACCACTAGT                                             |
| Gh_D09G0858      | 2350 | TACATCAAACATTATACTGAATTTGTAAC     | TTCCCTCTCATCTTCTTCTGATAATGTCTGTG                            |
| Gh_A09G2473_mRNA | 2321 | TACATCAAACATTATACTGAATTTGTAAG     | TTCCCTCTCATCTTCTTCTGATAATGTCTGTG                            |
| Gh_A09G2473      | 2192 | AGCAACAAAAGG                      | TAAATAAAATTCACGAGTGCTCA-ATCTGTGGCTCGGAATTCACGTC             |
| Gh_D09G0858      | 2410 | CAGGTGTTGTTGGCTTGACTCCGGTATAAAATC | TATCGATGAAACCAGTTTGGTGTTC-                                  |
| Gh_A09G2473_mRNA | 2381 | CAGGTGTTGTTGGCTTGACTCCGGTATAAAATC | TATCGATGAAACCAGTTTGGTGTTC-                                  |
| Gh_A09G2473      | 2251 | C-GGTCAA                          | CCCTCGGAGGTCACATGAGAA                                       |
| Gh_D09G0858      | 2469 | -GCTATTTGTTGGTTGGATTTGGCAGCTTCTC  | TTATAGAGCCGCATGTGATGTTGCTTTC                                |
| Gh_A09G2473_mRNA | 2440 | -GCTATTTGTTGGTTGGATTTGGCAGCTTCTC  | TTATAGAGCCGCATGTGATGTTGCTTTC                                |
| Gh_A09G2473      | 2309 | AGCAACCAAGAT                      | CCATGAATGGCAATGATGACATCAAGCCTAGGAATATTACGCCTTTG             |
| Gh_D09G0858      | 2528 | AATGTTGATAGCGTGT                  | TATATGAGATTGTGCAGACAAGTATTTAGT                              |
| Gh_A09G2473_mRNA | 2499 | AATGTTGATAGCGTGT                  | TATATGAGATTGTGCAGACAAGTATTTAGT                              |
| Gh_A09G2473      | 2369 | GATCTTAAT--CTTCC                  | TGCACCTGAAGATGATGTTAGAGATTCCAT--GTTCCG                      |
| Gh_D09G0858      | 2588 | AGACCTTTGTTATGTCATTATTA           | TCAACCCAATAAAAAATTAGCACATGGCTTGTGAACC                       |
| Gh_A09G2473_mRNA | 2559 | AGACCTTTGTTATGTCATTATTA           | TCAACCCAATAAAAAATTAGCACATGGCTTGTGAACC                       |
| Gh_A09G2473      | 2425 | AA                                | CAACCCCAACAAGCTATTGCTTTC--TCCACACCAGCTTTGGTAGATTGCC-ATTACTA |
| Gh_D09G0858      | 2648 | TGCAGACTGTAAAAC                   | TTGCCTTTTTGAGCTTATGAAATTTTATGGT                             |
| Gh_A09G2473_mRNA | 2619 | TGTAGACTGTAAAAC                   | TTGCCTTTTTGAGCTTATGAAATTTTATGGT                             |
| Gh_A09G2473      | 2482 | ACTCGAC-ATGAACTTAGTCT----         | AACCAC                                                      |
| Gh_D09G0858      | 2708 | GGAAATTATGATGCCTT                 | CTTGTAGTCAGTTATATCTCTGCTTCTCCTGGGAGTTGAGATC                 |
| Gh_A09G2473_mRNA | 2679 | GGAAATTATGATGCCTT                 | CTTGTAGTCAGTTATATCTCTGCTTCTCCTGGT                           |
| Gh_A09G2473      | 2529 | GGCA--TGTGATA                     | CC-----ACTAAGTGC                                            |
| Gh_D09G0858      | 2768 | TGTAATTTGGCCGACCAA                | ACTCTCAATCCCTACCTGTG                                        |
| Gh_A09G2473_mRNA | 2739 | TGTAATTTGGCCGACCAA                | ACTCTCAATCCCTACCAGTGATGGGTGGAAGTATAAAATTGC                  |
| Gh_A09G2473      | 2578 | TGTGCTTCA--TGAGCTT                | GAGGATGATCTTGCAAAGGGAGTGGCAGAGGCA-ACAATTGT                  |
| Gh_D09G0858      | 2828 | ACAAAAAT                          | TATAATCATTAGTTATCTTATATAATATTA                              |
| Gh_A09G2473_mRNA | 2799 | ACAAAAAT                          | TATAATCATTAGTTATCTTATATAATATTA                              |
| Gh_A09G2473      | 2635 | C-GACAAT                          | CAGGAGCACATTTCAATCCTAACAATATGACACAT-----GGT                 |
| Gh_D09G0858      | 2888 | ATCTCTAGCAACTCCACCCCT             | TACCTCTCATAATGAGAAAAAAAAAAAAAGAGGTTTGTCT                    |
| Gh_A09G2473_mRNA | 2859 | ATCTCTAGCAACTCCACCCCT             | TACCTCTCATAATGAGAAAAAAAAAAAA-----GGTTTGC                    |
| Gh_A09G2473      | 2688 | CGATGAA                           | GTA-----CGCCATGCGGGTGACC-TGGGAAACATAA-----TTGCTA            |

Gh\_D09G0858 2948 TTGCTGACTAGCGAGATCGGATTGGCTAGATGAAGAATTGGTCATGGTATCGGTTCTAAA  
Gh\_A09G2473\_mRNA 2914 ATGCTGACTAGCGAGATTGGATTGGCTGGAGGAAGAATTGGTCATGGTATCGGTTCTAAA  
Gh\_A09G2473 2732 ATGCTGATGCAATGAGTATGG--TGACACAACGAATGGTGCATGTC-TACAGGTCCTACA

Gh\_D09G0858 3008 ----TAAAGGCTTGGAGTGGTTGACTTGTAAATATGTTCAAATTGATTAATCAGATCGAT  
Gh\_A09G2473\_mRNA 2974 ----TAAAGGATTGGAGTGGTTGATTTGTGAATAAGTTCAAATTGATTAGTCGGAACGAT  
Gh\_A09G2473 2789 ACTGTGAATGTTTCAATTACTGGTCTTACTCCTGGGCCTCA-TGGCTTCCACCTAATGGC

Gh\_D09G0858 3064 CAAATTAATTTTTTAAAAATATTTTTTAAATTTTTTAAATAATCTATTCATTTAAAGTAAAC  
Gh\_A09G2473\_mRNA 3030 TAAATTGATTTTTTAAAAATATTTTTTAAATTTTTTAAATAATTTATTCATTTGAACTAAAC  
Gh\_A09G2473 2848 TG--CCCATATTTTTCAACACAACCCCTCCCACCTCCCTCTCTCTTT-TCCATCTCAAC

Gh\_D09G0858 3124 AAATTCATCAGATTAGTTGAACTGACTGAAAAGAAATAGTTTAATTGGTTCCACCACCGA  
Gh\_A09G2473\_mRNA 3090 AAATTCATCAGAT-----GAAAATAAATAGTTTAATTGGTTTCACCACCGA  
Gh\_A09G2473 2905 TAACCCCTTCAAAC-----CCACCAGTTCTTCTCTCT

Gh\_D09G0858 3184 CTTGCTTTGCTACCTCTCACAGCCTCTT-----  
Gh\_A09G2473\_mRNA 3136 CTTGCTTTGCTACCTCTCACAGCCTCTTTCGTGGTAAGAGTTCAACAACGGCAGGAAAC  
Gh\_A09G2473 2937 CATTTTCGTGGGTCTCTCTTAAAGCTCCCTCGTCA-----

Gh\_D09G0858 3212 -----GCGGCTGTGCGATGTTCTTACCTCCCACAAACTGACATCATTTATTTAT  
Gh\_A09G2473\_mRNA 3196 GGCAAAGAAATGCGGCTGTGCCATGTTCTTACCTCCCACAAACC AACATCATTTATTTAT  
Gh\_A09G2473 2971 -----ATCCCTCTCCCTTGCTGCTACTATTCCAAG--AAGCCCTTTTCTGTGT

Gh\_D09G0858 3261 TGATTAATTTCTGTACATTC AACCTTCATTTTTTTTATCACAACCTTTTTTAAATAAAAT  
Gh\_A09G2473\_mRNA 3256 TGATTGATTGCCTGTACATTC AACCTTCATTTTTTTA--TACAACCTTTTTTAAATAAAAT  
Gh\_A09G2473 3018 TTCTG-TTACCAAGA----AAGCTGTCCCTGTTCTTA----AAGGTAATTGGAAGTTG

Gh\_D09G0858 3321 GGGACATA--ATATTC AATTGAGATAGAAAGTCTTTAAATCTTGAATTAATTTTTTACG  
Gh\_A09G2473\_mRNA 3314 GGGACATATAATATTC AATTGAGATAGAAAGTGTTTAAATCTTGAATTAATTTTTTACG  
Gh\_A09G2473 3069 AAGCCGT----TGT CACGTTGACCCAGGAA-----AATGATGGGGAAG-----

Gh\_D09G0858 3379 TAGTTTAAATATCGCAATATATCTTATTATTTATTCAATATGTTGACTAATATTAATTTTT  
Gh\_A09G2473\_mRNA 3374 TAGTTTAAATATCGCAATATATCTTATTATTTATTCAATATGTTGACTAATATTAATTTTT  
Gh\_A09G2473 3108 -CGGTTGATAT-GCAAAGCTCAAGCTGTATTTGTGGGGTCTGATCATCATCATCAAGAAGC

Gh\_D09G0858 3439 GTTAAAATCATGGATCACA AATCCTATACCACACCAATTAATCAAAAAACGAATC-TGT  
Gh\_A09G2473\_mRNA 3434 GTTAAAATCATGGATCACA AATCCTTACCACACCAATTAATCAAAAAACGAATC-TGT  
Gh\_A09G2473 3166 CTTGA--TCATGAAAGGCAAG-----CGTACCAAGGCCCAAAGATCGCCATCCCTGT

Gh\_D09G0858 3498 TGGGTGATGCATGAACCTT CAGAAGGAGCTTCGTTGGAAACAATGAACTTTGCTGCGTA  
Gh\_A09G2473\_mRNA 3493 TGGGTGATGCATGAACCTT CAGAAGGAGCTTCGTTGGAAACAATGAACTTTGCTGCGTA  
Gh\_A09G2473 3216 TTGCTGTCGCCGTGACTTC-----GAGCT-CATC--AAATGGTG-----GTGATGGA

Gh\_D09G0858 3558 TTTGTGGATAAA-ATAAACTACTGCTTTTTAACATTTGTTATTTT CAGAATCTTTCTTAGATT  
Gh\_A09G2473\_mRNA 3553 TTTGTGGATAAA-ATAAACTACTGCTTTTTAACATTTGTTATTTT CAGAATCTTTCTTAGATT  
Gh\_A09G2473 3260 GTCTGGAGCAATATAA CTCGATTTCTCCGATGACATCCGATGAGATTTACGAGAGC

Gh\_D09G0858 3617 TGCCAAAACCTGTCATGCATGCCACTTTGATCTCAACTGCTGTTGTTGTTGGCTCTTTTT  
Gh\_A09G2473\_mRNA 3612 TGCCAAAACCTGTCATGCATGCCACTTTGATCTCAACTGCTGTTGTTGTTGGCTCTTTTT  
Gh\_A09G2473 3320 ACCGAGGAAGAGAGGAGATGGCTAAATG--CCTAATCA-----TGTGGCACAAAGT

Gh\_D09G0858 3677 TATGGCTCGGGCAAAGCCAATGCTAAATTGCTACAGTGAAATGGCTAGTTTGGGAAACTA  
Gh\_A09G2473\_mRNA 3672 TATGGCTCGGGCAAAGCCAATCCTAAATTGCTACAGTGAAATGGCTAGTTTGGGAAACTA  
Gh\_A09G2473 3371 GATGGTCCCAAAGGAGTACTGTTGAAGCGAAATT-CAAGATAGCTACTAAGACAAACAA

Gh\_D09G0858 3737 AGAACTGGAACTTAAGCATAATGGAGTTGATATTTTAATCGTTTTCAGCATGCATACCAAG  
Gh\_A09G2473\_mRNA 3732 AGAACTTGGAACTTAAGCATAATGGAGTTGATATTTTAATCGTTTTCAGCATGCATAACAAG  
Gh\_A09G2473 3430 GGG-----TGAGCTTTATG-----TCCACGAGTGTAAAACCTTGTAACCGG

Gh\_D09G0858 3797 ATTATAGACTTGTGAGCTTTTTCATTGAAGAACCCTTTTGTAGTATCACTTAATCAGTTG  
Gh\_A09G2473\_mRNA 3792 ATTATAGACTTGTGAGCTTTTTCATTCAAGAACCCTTTTGTAGTATCACTTAATCAGTTG  
Gh\_A09G2473 3470 TCTTCCCTTCGT--CCAAGCACT-AGGAGGCCATATGGCAA-GCCAC--AAGAAGCCT

Gh\_D09G0858 3857 ATTCTATGATGGCANCCC-CCCCCCCCGCCCAAAAATAAATACCATACTTGATTTGAT  
Gh\_A09G2473\_mRNA 3852 ATTCTATGATGGCATCTCAATGCGAGACCCCCCCCCNNNNNNNNNNNNNNNNNNNNNN  
Gh\_A09G2473 3524 A----AAGCGCCATGCGAGCAGAAAAGACCCTAGTTTTGGCAGTTAATGATGCAGT

Gh\_D09G0858 3916 CAAATTATGATGACAAAAGAGAAGGGGGGGGAGCTGGCGTGAAAGTAACCAGAATCTATAT  
Gh\_A09G2473\_mRNA 3912 NNNNNNNNNNNNNNNNNNNNGGGGGGGGGGGAGCTGGCGTGAAAGTAACCAGAATCTAT--  
Gh\_A09G2473 3580 CATTGCTTTACGAGTAAGCAACAAAAGGGTAATAAAATTCACGAGTGTCAATCTGTGG

Gh\_D09G0858 3976 GAGGGAACCTCAAATT-GATTAGGGTGTGGTATTTTGCCTTTAAGAAGACATGGAGTGAATG  
Gh\_A09G2473\_mRNA 3970 GAGGGAACCTCAAATT-GATTGGAGTGTGGTATTTTGCCTTTAAGAACACATGGAGTGAATG  
Gh\_A09G2473 3640 CTCGGAAATCACCTCCGTCAGGCCCTCGGAGGTCAAT-GAGAAGGCATAGGAC-AGCA

Gh\_D09G0858 4035 AAGGTAGCATCCCATGCTTTTTTAACGTGCAGTTCCTCATTCCCTTTTGCTTTAATTTAATA  
Gh\_A09G2473\_mRNA 4029 AAGGTAGCATCCCATGCTTTTTTAACGTGCAGTTCCTCATTCCCTTTTGCTTTAATTTAATA  
Gh\_A09G2473 3698 TCAGCAGCTGTGCAAGCAACCAGATGCCATGAATGCCAATGATGACATCAAGCCTAGG

Gh\_D09G0858 4095 ATAACATATTGTTATTATATATGGAGTGACTTGGGTGGGTGTGTGTGAACTCTGAAACTCT  
Gh\_A09G2473\_mRNA 4089 ATAACATATTGTTATTATATATGGAGTGACTTGGGTGGGTGTGTGTGAACTCTGAAACTCT  
Gh\_A09G2473 3758 AATAATTAC-GCCTTTGATCTTAATCTTCTGCACC--TGAAGATGATGTTAGAGATTCC

Gh\_D09G0858 4155 CTCTTGACGTTAAGAACAACCTCAATTGAAGTGTCCCTAACTCCCATTTTTTGCCCCTTTTCG  
Gh\_A09G2473\_mRNA 4149 CTCTTGACGTTAAGAACAACCTCAATTGAAGTGTCCCTAACTCCCATTTTTTGCCCCTTTTCG  
Gh\_A09G2473 3815 ATGTTGCAATTTGGAACACCCCAAC-AAGCTATTGTCTTCTCCACACCAGCTTTGGTAGA

Gh\_D09G0858 4215 CCACC-CTATCTTTTCCACCTAATGCTCAACTCATATCTTTACCTAC--ACTTATTGTAG  
Gh\_A09G2473\_mRNA 4209 CCACC-CTATCTTTTCCACCTAATGCTCAACTCATATCTTTACCTAC--ACTTATTGTAG  
Gh\_A09G2473 3874 TTCCATTACTAAGTGGACATGAAGTACTTAACCACTGGGAATGCTGGCGGAAGATTG

Gh\_D09G0858 4272 TCCTATCATCTCCCTAAGATGCTTGTTAACCAACCTAAATACGTAGTT-TATTTGATTG  
Gh\_A09G2473\_mRNA 4266 TCCTATCATCTCCCTAAGATGCTTGTTAACCAATCCTAAATACATAGTT-TATTTGATTG  
Gh\_A09G2473 3934 GCATCTGATACCACTAAGTGGCCCCCAATCGGGTTGTTGGAAACAGCATTGTGGTTTCATGA

Gh\_D09G0858 4331 TCTTAAATAATTGTCCTAATTCTAAATCAAATATTCCTCCATTTCTTTGTAATTAGAGA  
Gh\_A09G2473\_mRNA 4325 TCTTAAATAATTATCCTAATTCTAGACCAAATATTCCTCCATTTCTTTGTAATTAGAGA  
Gh\_A09G2473 3994 GCTTGAC-GATGATCTTGGAAAGGGAGTGG-CAGAGGCAACAATTGTGGCAATCAGG--

Gh\_D09G0858 4391 AATACATAATTATACCAACAATAAAAATAAACAATAAATCTCTGTGTGCGAGTAACTCTT  
Gh\_A09G2473\_mRNA 4385 AATACATAATTATACCAACAATAAAAATAAACAATAAATCTCTGTGTGCGAGTAACTCTT  
Gh\_A09G2473 4050 AGCACATTTCAATCTTAACAATA--TGACACATGGTCTCTGAGGATGAAGTACGCCAT

Gh\_D09G0858 4451 ACTCCTAAAAAACCCTAAAT-TGCACACAAGGAATTAAGGGGAGTAATTTTATGA  
Gh\_A09G2473\_mRNA 4445 ACTACTAAGAAAACCCTAAATCACGCACACAAGGAATTAAGGGA-AGTAATTTG-ATGA  
Gh\_A09G2473 4108 GC----GGGTGACC TGGGAAACATAATTGCTAATGCTGATGCATGAGTATGGTGACACAA

Gh\_D09G0858 4510 TGAAAGTAAAAACTTTTCTTTCTACAGTAGCTTTTAAAAGTTGGAAAT---GGAAAGAAA  
Gh\_A09G2473\_mRNA 4503 TGAAAGTAAAAACTTTTCTTTCTACTAGTAGCTTTTAAAAGTTGGAAAT---GAAAAGAAA  
Gh\_A09G2473 4164 CGAATGGGTGCATGTCCTACAGGTCCTA-CAACTGTGAATGTTCCGAATTACTGGTCTTACT

Gh\_D09G0858 4567 AAAGAAGTGGGTGTTTTATAAGCAACAATAGTTATACTATTCATGGGCGGCTTTTCTGAG  
Gh\_A09G2473\_mRNA 4560 AAAGAAGTGGGTGTTTTATAAGCAACAATAGTTATACTATTCATGGGCGGCTTTTCTGAG  
Gh\_A09G2473 4223 CCTGGCCTCA TGGCTTCCACCTAATGGCTGCCATAATTTTCACGACAACCCCGTCCAC

Gh\_D09G0858 4627 TTTTGACTCCAAAAATAACTGTCACCCTTCTTGTC--TTTACTATATATAAGAACCCCA  
Gh\_A09G2473\_mRNA 4620 TTTTGACTCCAAAAATAACTGTCACCCTTCTTGTC--TTTCTATATATAAGAACCCCG  
Gh\_A09G2473 4283 CTGCTCTCTCTTTTCCATCCCTCAACTAACCCCTCAACCCACCGGTTCTTCTCTCTCA

Gh\_D09G0858 4685 TTTC-----TCCATCTATGCTTCCTCCGTGATCATTTTTTGCTCTTTCTAGCTGTTAC  
Gh\_A09G2473\_mRNA 4678 TTTC-----TCCATCTATGCTTCCTCCGTGATCATTTTTTGCTCTTTCTAGCTGTTAC  
Gh\_A09G2473 4343 TTTCGTGGGGTCTCTCTTAAGCTCCCTCGTCAATCCCTCTCCCTTGTCTGCTA-CTATTCC

Gh\_D09G0858 4738 TCATTTTCTTTTGGTTAGGTCACACTACTTGCTTGTGTTGTTGAGTACAATTTTATGTCTT  
Gh\_A09G2473\_mRNA 4731 TCATTTTCTTTTGGTTAGGTCACACTACTTGCTTGTGTTGTTGAGTACAATCTTATGTCTT  
Gh\_A09G2473 4402 CAAGAAGCCCTTTTCTCTGTT-TGCTGTTACCAAGAAAGCTGTGCTGTTCTTAAAGGTA

Gh\_D09G0858 4798 TTCTAAGTCTTTCATACTATTTTTGACTGGGTTTTGG---TTTAGGGGAAGGGGTGATA  
Gh\_A09G2473\_mRNA 4791 TTCTAAGTCTTTCATACTATTTTTGACTGGCTTTTTGG---TTTAGGGGAAGGGGTGATA  
Gh\_A09G2473 4461 ATTCCGAAGTTGAAAGCGTGTGTCACGTTGACCCAGGAAAATGATGGGGAAGGGGTGATA

Gh\_D09G0858 4855 TGCAAGCTCAAGCTGTATTTGTGGGGTCTGATCATCATCTTCATCAAGCCTTGATCATGA  
Gh\_A09G2473\_mRNA 4848 TGCAAGCTCAAGCTGTATTTGTGGGGTCTGATCATCATCATCAAGAAGCCTTGATCATGA  
Gh\_A09G2473 4521 TGCAAGCTCAAGCTGTATTTGTGGGGTCTGATCATCATCATCAAGAAGCCTTGATCATGA

Gh\_D09G0858 4915 AAGGCAAGCGTACCAAGCGCCAAAGATCGCCATCCCTGTTTGGTGTGCGGGTACTTCGA  
Gh\_A09G2473\_mRNA 4908 AAGGCAAGCGTACCAAGCGCCAAAGATCGCCATCCCTGTTTGGTGTGCGGGTACTTCGA  
Gh\_A09G2473 4581 AAGGCAAGCGTACCAAGCGCCAAAGATCGCCATCCCTGTTTGGTGTGCGGGTACTTCGA

Gh\_D09G0858 4975 GCTCATCAAATGGTGGTGTGAGTGGTGGAGGAATATAACTCGATTTCTTCTCCGACGA  
Gh\_A09G2473\_mRNA 4968 GCTCATCAAATGGTGGTGTGAGTGGTGGAGGAATATAACTCGATTTCTTCTCCGATGA  
Gh\_A09G2473 4641 GCTCATCAAATGGTGGTGTGAGTGGTGGAGGAATATAACTCGATTTCTTCTCCGATGA

Gh\_D09G0858 5035 CATCCGACGAGATTTACGGAGCACCAGGAAGAAGAGGAGATGGCTAATTGCCTAATCA  
Gh\_A09G2473\_mRNA 5028 CATCCGATGAGATTTACGAGAGCACCAGGAAGAAGAGGAGATGGCTAATTGCCTAATCA  
Gh\_A09G2473 4701 CATCCGATGAGATTTACGAGAGCACCAGGAAGAAGAGGAGATGGCTAATTGCCTAATCA

Gh\_D09G0858 5095 TGTGGCACAAAGTGATGGTCCCAAAGGAGTACTGTTGAAGCGAAATTCAGATAGCTA  
Gh\_A09G2473\_mRNA 5088 TGTGGCACAAAGTGATGGTCCCAAAGGAGTACTGTTGAAGCGAAATTCAGATAGCTA  
Gh\_A09G2473 4761 TGTGGCACAAAGTGATGGTCCCAAAGGAGTACTGTTGAAGCGAAATTCAGATAGCTA

Gh\_D09G0858 5155 CTAAGACAAAACAAGGGTGAGCTTTATGTCCACGAGTGTAACCTTGTAAACCGGCTTTCC  
Gh\_A09G2473\_mRNA 5148 CTAAGACAAAACAAGGGTGAGCTTTATGTCCACGAGTGTAACCTTGTAAACCGGCTTTCC  
Gh\_A09G2473 4821 CTAAGACAAAACAAGGGTGAGCTTTATGTCCACGAGTGTAACCTTGTAAACCGGCTTTCC

Gh\_D09G0858 5215 CTTCGTTCCAAGCACTAGGAGGCCATATGGCAAGCCACAAGAAGCCTAAAGGCGCCATTG  
Gh\_A09G2473\_mRNA 5208 CTTCGTTCCAAGCACTAGGAGGCCATATGGCAAGCCACAAGAAGCCTAAAGGCGCCATTG  
Gh\_A09G2473 4881 CTTCGTTCCAAGCACTAGGAGGCCATATGGCAAGCCACAAGAAGCCTAAAGGCGCCATTG

Gh\_D09G0858 5275 CAGAGCAGAAAAGACCCTAGTTTTGGCAGTTAATGATGCAGTCATTGCTTTACGAGTAA  
Gh\_A09G2473\_mRNA 5268 CAGAGCAGAAAAGACCCTAGTTTTGGCAGTTAATGATGCAGTCATTGCTTTACGAGTAA  
Gh\_A09G2473 4941 CAGAGCAGAAAAGACCCTAGTTTTGGCAGTTAATGATGCAGTCATTGCTTTACGAGTAA

Gh\_D09G0858 5335 GCAACAAAAAGGGTAATAAAAATTCACGAGTGCTCAATCTGTGGTTCGGAATTCACGTCCG  
Gh\_A09G2473\_mRNA 5328 GCAACAAAAAGGGTAATAAAAATTCACGAGTGCTCAATCTGTGGCTCGGAATTCACGTCCG  
Gh\_A09G2473 5001 GCAACAAAAAGGGTAATAAAAATTCACGAGTGCTCAATCTGTGGCTCGGAATTCACGTCCG

Gh\_D09G0858 5395 GTCAAGCCCTCGGAGGTCACATGAGAAGGCATAGGACAGCATCAGCAGCTGCTGCAAGCA  
Gh\_A09G2473\_mRNA 5388 GTCAAGCCCTCGGAGGTCACATGAGAAGGCATAGGACAGCATCAGCAGCTGCTGCAAGCA  
Gh\_A09G2473 5061 GTCAAGCCCTCGGAGGTCACATGAGAAGGCATAGGACAGCATCAGCAGCTGCTGCAAGCA

Gh\_D09G0858 5455 ACCAAGATGCCATGAATGGCAGATGATGACATCAAGCCTAGGAATATTACGCCTTTGGATC  
Gh\_A09G2473\_mRNA 5448 ACCAAGATGCCATGAATGGCAATGATGACATCAAGCCTAGGAATATTACGCCTTTGGATC  
Gh\_A09G2473 5121 ACCAAGATGCCATGAATGGCAATGATGACATCAAGCCTAGGAATATTACGCCTTTGGATC

Gh\_D09G0858 5515 TTAATCTTCCTGCACCTGAAGATGATGTTAGAGATTCCATGTTTGAATTTGGAACACCCC  
Gh\_A09G2473\_mRNA 5508 TTAATCTTCCTGCACCTGAAGATGATGTTAGAGATTCCATGTTTGAATTTGGAACACCCC  
Gh\_A09G2473 5181 TTAATCTTCCTGCACCTGAAGATGATGTTAGAGATTCCATGTTTGAATTTGGAACACCCC

Gh\_D09G0858 5575 AACAAAGCTATTGTCTTCTCCACACCAGCTTTGGTAGATTGCCATTACTAAACAAGGAAAA  
Gh\_A09G2473\_mRNA 5568 AACAAAGCTATTGTCTTCTCCACACCAGCTTTGGTAGATTGCCATTACTAA-----  
Gh\_A09G2473 5241 AACAAAGCTATTGTCTTCTCCACACCAGCTTTGGTAGATTGCCATTACTAAGTGGACATGA

Gh\_D09G0858 5635 TCCTGAACCAA  
Gh\_A09G2473\_mRNA -----  
Gh\_A09G2473 5301 ACTTAGTCTAA
