# Supplementary material for: Genome-wide characterization and expression analyses of superoxide dismutase (SOD) genes in Gossypium hirsutum
Source: PubMed Central journal article supplement (PMC5429560; doi:10.1186/s12864-017-3768-5), 2017-05-12
Supplement: 12864_2017_3768_MOESM6_ESM.pdf [file 12864_2017_3768_MOESM6_ESM.pdf]

**Additional file 6: Table S2.** Motif sequences of GhSOD proteins identified by MEME tools. Cu ion binding sites and Zn ion binding sites are in box and green box, respectively. The conserved metal-binding domain “DVWEHAYY” for Mn-SODs or Fe-SODs are in red box, and Cu/Zn-SOD signatures (GFH[VL]H[AE][LY]GDTTN and GNAGGR[VL][AG]CG) are underline. **Sod\_Cu** ([PF00080](#)), copper/zinc superoxide dismutase; **Sod\_Fe\_C** ([PF02777](#)), iron/manganese superoxide dismutases, C-terminal domain; **Sod\_Fe\_N** ([PF00081](#)), iron/manganese superoxide dismutases, alpha-hairpin domain.

| Motif number | Width (aa) | Consensus sequence                                                                                                                                                                                                                                                                                                                                                                                    | Pfam domain           |
|--------------|------------|-------------------------------------------------------------------------------------------------------------------------------------------------------------------------------------------------------------------------------------------------------------------------------------------------------------------------------------------------------------------------------------------------------|-----------------------|
| 1            | 62         | [SE]G[VT]V[TF][FL]TQE[GT]DGPTTV[TN][GV][RN]<br>ITGL[TK]PGLHGF[ <span style="border: 1px solid black; padding: 0 2px;">H</span> ][VL][ <span style="border: 1px solid black; padding: 0 2px;">H</span> ][AE][LY]GDTTNGCMST<br>GP[ <span style="background-color: #90EE90; padding: 0 2px;">H</span> ]FNP[NA][GN][KM][TE][ <span style="background-color: #90EE90; padding: 0 2px;">H</span> ]GAPED[EV] | Sod_Cu<br>(PF00080)   |
| 2            | 20         | [VN]R[ <span style="background-color: #90EE90; padding: 0 2px;">H</span> ][AG][ <span style="background-color: #90EE90; padding: 0 2px;">H</span> ]DLGN[IV][TI][AV][GN][AD]DG[VC]A[SE]<br>[FA]                                                                                                                                                                                                        | Sod_Cu<br>(PF00080)   |
| 3            | 47         | QIPLSGP[NH]S[IV]IGRA[VF]VVH[AE][DL][PE]DDL<br>GKGGHEL[S][KL][TS]TGNAGGR[VL][AG]CGII                                                                                                                                                                                                                                                                                                                   | Sod_Cu<br>(PF00080)   |
| 4            | 28         | [TR][DH]FGS[LF]ESLI[QE]K[MF]N[AS][EA][GA]AA<br>L[QF]GSGVWL                                                                                                                                                                                                                                                                                                                                            | Sod_Fe_N<br>(PF00081) |
| 5            | 40         | TY[SE]LK[DA]PPY[DP]L[GN]ALEP[AH]MS[GR]E[IT]<br>[ML][QE][LY]H[WH][QG]KHHRTYV[TE]N[YL]NK                                                                                                                                                                                                                                                                                                                | Sod_Fe_C<br>(PF02777) |
| 6            | 33         | L[VN][TP][NL][VG][WP][DN][LY][VF]PLL[GN]<br>[IL][ <span style="background-color: #FF0000; padding: 0 2px;">DVWEHAYY</span> ][QS][YT][QK]N[VD]RPDYL[LI]                                                                                                                                                                                                                                                | Sod_Fe_C<br>(PF02777) |

Significant motifs (p-value<1e-100) of more than 20 aa lengths are predicted by MEME earch.
