# Supplementary material for: Genome-wide characterization and expression analyses of superoxide dismutase (SOD) genes in Gossypium hirsutum
Source: PubMed Central journal article supplement (PMC5429560; doi:10.1186/s12864-017-3768-5), 2017-05-12
Supplement: 12864_2017_3768_MOESM8_ESM.pdf [file 12864_2017_3768_MOESM8_ESM.pdf]

**Additional file 8: Table S3.** The details of sequences used in the phylogenetic relationship analysis.

| Species                                       | Gene name                      | Locus ID                       | Transcript name          | Protein NCBI ID              |
|-----------------------------------------------|--------------------------------|--------------------------------|--------------------------|------------------------------|
| <i>Arabidopsis thaliana</i> <sup>1</sup>      | <i>AtCSD1</i>                  | <a href="#">AT1G08830</a>      | AT1G08830.1              | <a href="#">NP_172360</a>    |
|                                               | <i>AtCSD2</i>                  | <a href="#">AT2G28190</a>      | AT2G28190.1              | <a href="#">NP_565666</a>    |
|                                               | <i>AtCSD3</i>                  | <a href="#">AT5G18100</a>      | AT5G18100.1              | <a href="#">NP_197311</a>    |
|                                               | <i>AtMSD1</i>                  | <a href="#">AT3G10920</a>      | AT3G10920.1              | <a href="#">NP_187703</a>    |
|                                               | <i>AtMSD2</i>                  | <a href="#">AT3G56350</a>      | AT3G56350.1              | <a href="#">NP_191194</a>    |
|                                               | <i>AtFSD1</i>                  | <a href="#">AT4G25100</a>      | AT4G25100.1              | <a href="#">NP_194240</a>    |
|                                               | <i>AtFSD2</i>                  | <a href="#">AT5G51100</a>      | AT5G51100.1              | <a href="#">NP_199923</a>    |
|                                               | <i>AtFSD3</i>                  | <a href="#">AT5G23310</a>      | AT5G23310.1              | <a href="#">NP_197722</a>    |
| <i>Amborella trichopoda</i> <sup>2</sup>      | <i>AmtCSD1</i>                 | <a href="#">LOC18445195</a>    | XM_011629099.1           | <a href="#">XP_011627401</a> |
|                                               | <i>AmtCSD2</i>                 | <a href="#">LOC18448821</a>    | XM_011630490.1           | <a href="#">XP_011628792</a> |
|                                               | <i>AmtCSD3</i>                 | <a href="#">LOC18428583</a>    | XM_006837899.2           | <a href="#">XP_006837962</a> |
|                                               | <i>AmtMSD1</i>                 | <a href="#">LOC18432270</a>    | XM_011624339.1           | <a href="#">XP_011622641</a> |
|                                               | <i>AmtFSD1</i>                 | <a href="#">LOC18429084</a>    | XM_011623380.1           | <a href="#">XP_011621682</a> |
|                                               | <i>AmtFSD2</i>                 | <a href="#">LOC18445372</a>    | XM_011629184.1           | <a href="#">XP_011627486</a> |
| <i>Brachypodium distachyon</i> <sup>1</sup>   | <i>BdCSD1</i>                  | <a href="#">Bradi1g18340</a>   | Bradi1g18340.1           | <a href="#">XP_003562484</a> |
|                                               | <i>BdCSD2</i>                  | <a href="#">Bradi1g69680</a>   | Bradi1g69680.1           | <a href="#">XP_003558478</a> |
|                                               | <i>BdCSD3</i>                  | <a href="#">Bradi3g43070</a>   | Bradi3g43070.1           | <a href="#">XP_003574947</a> |
|                                               | <i>BdMSD1</i>                  | <a href="#">Bradi2g30580</a>   | Bradi2g30580.1           | <a href="#">XP_003568674</a> |
|                                               | <i>BdFSD1</i>                  | <a href="#">Bradi1g50550</a>   | Bradi1g50550.1           | <a href="#">XP_003561161</a> |
|                                               | <i>BdFSD2</i>                  | <a href="#">Bradi1g51140</a>   | Bradi1g51140.1           | <a href="#">XP_003557205</a> |
| <i>Chlamydomonas reinhardtii</i> <sup>2</sup> | <i>CrMSD1</i>                  | <a href="#">MSD1</a>           | XM_001700006.1           | <a href="#">XP_001700058</a> |
|                                               | <i>CrMSD2</i>                  | <a href="#">MSD2</a>           | XM_001699025.1           | <a href="#">XP_001699077</a> |
|                                               | <i>CrMSD3</i>                  | <a href="#">MSD3</a>           | XM_001695895.1           | <a href="#">XP_001695947</a> |
|                                               | <i>CrMSD4</i>                  | <a href="#">MSD4</a>           | XM_001690884.1           | <a href="#">XP_001690936</a> |
|                                               | <i>CrMSD5</i>                  | <a href="#">MSD5</a>           | XM_001691696.1           | <a href="#">XP_001691748</a> |
|                                               | <i>CrFSD1</i>                  | <a href="#">FSD1</a>           | XM_001690539.1           | <a href="#">XP_001690591</a> |
| <i>Gossypium arboreum</i> <sup>3</sup>        | <i>GaCSD1</i>                  | <a href="#">Cotton_A_21978</a> | FJ222550.1               | <a href="#">ACI46676</a>     |
|                                               | <i>GaCSD2</i>                  | <a href="#">Cotton_A_24238</a> | JRRC01475755.1           | <a href="#">KHG07500</a>     |
|                                               | <i>GaCSD3</i>                  | <a href="#">Cotton_A_30467</a> | JRRC01403715.1           | <a href="#">KHG04013</a>     |
|                                               | <i>GaCSD4</i>                  | <a href="#">Cotton_A_32487</a> | EF123067.1               | <a href="#">ABL63518</a>     |
|                                               | <i>GaCSD5</i>                  | <a href="#">Cotton_A_36793</a> | KN396107.1               | <a href="#">KHG11568</a>     |
|                                               | <i>GaMSD1</i>                  | <a href="#">Cotton_A_04050</a> | JRRC01430423.1           | <a href="#">KHG05444</a>     |
|                                               | <i>GaMSD2</i>                  | <a href="#">Cotton_A_21263</a> | KN395990.1               | <a href="#">KHG11516</a>     |
|                                               | <i>GaFSD1</i>                  | <a href="#">Cotton_A_03623</a> | KN429884.1               | <a href="#">KHG24725</a>     |
| <i>GaFSD2</i>                                 | <a href="#">Cotton_A_26478</a> | KN444093.1                     | <a href="#">KHG28218</a> |                              |

---

|                                         |                                  |                                 |                                |                              |                          |
|-----------------------------------------|----------------------------------|---------------------------------|--------------------------------|------------------------------|--------------------------|
| <i>Gossypium raimondii</i> <sup>2</sup> | <i>GrCSD1</i>                    | <a href="#">LOC105782588</a>    | XM_012607416.1                 | <a href="#">XP_012462870</a> |                          |
|                                         |                                  |                                 | XM_012607417.1                 | <a href="#">XP_012462871</a> |                          |
|                                         |                                  |                                 | XM_012607418.1                 | <a href="#">XP_012462872</a> |                          |
|                                         | <i>GrCSD2</i>                    | <a href="#">LOC105783575</a>    | XM_012609115.1                 | <a href="#">XP_012464569</a> |                          |
|                                         | <i>GrCSD3</i>                    | <a href="#">LOC105804461</a>    | XM_012637105.1                 | <a href="#">XP_012492559</a> |                          |
|                                         |                                  |                                 | XM_012637104.1                 | <a href="#">XP_012492558</a> |                          |
|                                         | <i>GrCSD4</i>                    | <a href="#">LOC105799144</a>    | XM_012629546.1                 | <a href="#">XP_012485000</a> |                          |
|                                         | <i>GrCSD5</i>                    | <a href="#">LOC105768981</a>    | XM_012589298.1                 | <a href="#">XP_012444752</a> |                          |
|                                         | <i>GrMSD1</i>                    | <a href="#">LOC105770420</a>    | XM_012591617.1                 | <a href="#">XP_012447071</a> |                          |
|                                         | <i>GrMSD2</i>                    | <a href="#">LOC105777435</a>    | XM_012600706.1                 | <a href="#">XP_012456160</a> |                          |
|                                         | <i>GrFSD1</i>                    | <a href="#">LOC105785559</a>    | XM_012611674.1                 | <a href="#">XP_012467128</a> |                          |
|                                         |                                  |                                 | XM_012611682.1                 | <a href="#">XP_012467136</a> |                          |
|                                         |                                  |                                 | XM_012611667.1                 | <a href="#">XP_012467121</a> |                          |
|                                         | <i>GrFSD2</i>                    | <a href="#">LOC105782623</a>    | XM_012607482.1                 | <a href="#">XP_012462936</a> |                          |
|                                         |                                  |                                 | XM_012607481.1                 | <a href="#">XP_012462935</a> |                          |
|                                         |                                  | XM_012607480.1                  | <a href="#">XP_012462934</a>   |                              |                          |
| <i>Glycine max</i> <sup>1</sup>         | <i>GmCSD1</i>                    | <a href="#">Glyma.19G240400</a> | Glyma.19G240400.1              | <a href="#">NP_001235298</a> |                          |
|                                         | <i>GmCSD2</i>                    | <a href="#">Glyma.03G242900</a> | Glyma.03G242900.1              | <a href="#">NP_001235936</a> |                          |
|                                         | <i>GmCSD3</i>                    | <a href="#">Glyma.16G153900</a> | Glyma.16G153900.1              | <a href="#">NP_001242811</a> |                          |
|                                         | <i>GmCSD4</i>                    | <a href="#">Glyma.11G192700</a> | Glyma.11G192700.1              | <a href="#">XP_003538169</a> |                          |
|                                         | <i>GmCSD5</i>                    | <a href="#">Glyma.12G081300</a> | Glyma.12G081300.1              | <a href="#">XP_003539793</a> |                          |
|                                         | <i>GmCSD6</i>                    | <a href="#">Glyma.12G178800</a> | Glyma.12G178800.1              | <a href="#">NP_001238038</a> |                          |
|                                         | <i>GmMSD1</i>                    | <a href="#">Glyma.06G144500</a> | Glyma.06G144500.1              | <a href="#">XP_003526813</a> |                          |
|                                         | <i>GmMSD2</i>                    | <a href="#">Glyma.04G221300</a> | Glyma.04G221300.1              | <a href="#">NP_001235066</a> |                          |
|                                         | <i>GmFSD1</i>                    | <a href="#">Glyma.02G087700</a> | Glyma.02G087700.1              | <a href="#">XP_003518624</a> |                          |
|                                         | <i>GmFSD2</i>                    | <a href="#">Glyma.20G196900</a> | Glyma.20G196900.1              | <a href="#">NP_001238486</a> |                          |
|                                         | <i>GmFSD3</i>                    | <a href="#">Glyma.10G193500</a> | Glyma.10G193500.1              | <a href="#">NP_001237901</a> |                          |
|                                         | <i>GmFSD4</i>                    | <a href="#">Glyma.20G050800</a> | Glyma.20G050800.1              | <a href="#">XP_003555663</a> |                          |
|                                         | <i>GmFSD5</i>                    | <a href="#">Glyma.10G117100</a> | Glyma.10G117100.1              | <a href="#">XP_003535933</a> |                          |
|                                         | <i>Oryza sativa</i> <sup>1</sup> | <i>OsCSD1</i>                   | <a href="#">LOC_Os03g22810</a> | LOC_Os03g22810.1             | <a href="#">ABF95937</a> |
|                                         |                                  | <i>OsCSD2</i>                   | <a href="#">LOC_Os03g11960</a> | LOC_Os03g11960.1             | <a href="#">ABF94673</a> |
| <i>OsCSD3</i>                           |                                  | <a href="#">LOC_Os07g46990</a>  | LOC_Os07g46990.1               | <a href="#">P28757</a>       |                          |
| <i>OsCSD4</i>                           |                                  | <a href="#">LOC_Os08g44770</a>  | LOC_Os08g44770.1               | <a href="#">P93407</a>       |                          |
| <i>OsMSD1</i>                           |                                  | <a href="#">LOC_Os05g25850</a>  | LOC_Os05g25850.1               | <a href="#">Q43008</a>       |                          |
| <i>OsFSD1</i>                           |                                  | <a href="#">LOC_Os06g02500</a>  | LOC_Os06g02500.1               | <a href="#">Q5VRL3</a>       |                          |
| <i>OsFSD2</i>                           |                                  | <a href="#">LOC_Os06g05110</a>  | LOC_Os06g05110.1               | <a href="#">Q5VSB7</a>       |                          |

---

---

|                                           |                                     |                                  |                                  |                              |
|-------------------------------------------|-------------------------------------|----------------------------------|----------------------------------|------------------------------|
| <i>Physcomitrella patens</i> <sup>1</sup> | <i>PpCSD1</i>                       | <a href="#">Pp3c24_4100</a>      | Pp3c24_4100.1                    | <a href="#">XP_001755582</a> |
|                                           | <i>PpCSD2</i>                       | <a href="#">Pp3c9_25690</a>      | Pp3c9_25690.1                    | <a href="#">XP_001770912</a> |
|                                           | <i>PpCSD3</i>                       | <a href="#">Pp3c9_24840</a>      | Pp3c9_24840.1                    | <a href="#">XP_001770943</a> |
|                                           | <i>PpMSD1</i>                       | <a href="#">Pp3c19_10240</a>     | Pp3c19_10240.1                   | <a href="#">XP_001774291</a> |
|                                           | <i>PpFSD1</i>                       | <a href="#">Pp3c7_19790</a>      | Pp3c7_19790.1                    | <a href="#">XP_001751975</a> |
|                                           | <i>PpFSD2</i>                       | <a href="#">Pp3c2_27440</a>      | Pp3c2_27440.1                    | <a href="#">XP_001756362</a> |
| <i>Populus trichocarpa</i> <sup>1</sup>   | <i>PtCSD1</i>                       | <a href="#">Potri.004G216700</a> | Potri.004G216700.1               | <a href="#">XP_006384962</a> |
|                                           | <i>PtCSD2</i>                       | <a href="#">Potri.009G005100</a> | Potri.009G005100.1               | <a href="#">XP_006378938</a> |
|                                           | <i>PtCSD3</i>                       | <a href="#">Potri.013G056900</a> | Potri.013G056900.1               | <a href="#">XP_002319157</a> |
|                                           | <i>PtCSD4</i>                       | <a href="#">Potri.019G035800</a> | Potri.019G035800.1               | <a href="#">XP_002325843</a> |
|                                           | <i>PtCSD5</i>                       | <a href="#">Potri.005G044400</a> | Potri.005G044400.1               | <a href="#">XP_006382702</a> |
|                                           | <i>PtCSD6</i>                       | <a href="#">Potri.013G031100</a> | Potri.013G031100.1               | <a href="#">XP_002319589</a> |
|                                           | <i>PtMSD1</i>                       | <a href="#">Potri.019G057300</a> | Potri.019G057300.1               | <a href="#">XP_002325924</a> |
|                                           | <i>PtMSD2</i>                       | <a href="#">Potri.013G092600</a> | Potri.013G092600.1               | <a href="#">XP_002319332</a> |
|                                           | <i>PtFSD1</i>                       | <a href="#">Potri.005G089600</a> | Potri.005G089600.1               | <a href="#">XP_002307154</a> |
|                                           | <i>PtFSD2</i>                       | <a href="#">Potri.012G112300</a> | Potri.012G112300.1               | <a href="#">XP_006376943</a> |
|                                           | <i>PtFSD3</i>                       | <a href="#">Potri.015G110400</a> | Potri.015G110400.1               | <a href="#">XP_002322315</a> |
|                                           | <i>Sorghum bicolor</i> <sup>1</sup> | <i>SbCSD1</i>                    | <a href="#">Sobic.007G166600</a> | Sobic.007G166600.1           |
| <i>SbCSD2</i>                             |                                     | <a href="#">Sobic.001G453800</a> | Sobic.001G453800.1               | <a href="#">XP_002465634</a> |
| <i>SbCSD3</i>                             |                                     | <a href="#">Sobic.001G371900</a> | Sobic.001G371900.1               |                              |
| <i>SbCSD4</i>                             |                                     | <a href="#">Sobic.002G407900</a> | Sobic.002G407900.1               |                              |
| <i>SbMSD1</i>                             |                                     | <a href="#">Sobic.009G093200</a> | Sobic.009G093200.1               | <a href="#">XP_002439542</a> |
| <i>SbFSD1</i>                             |                                     | <a href="#">Sobic.010G012900</a> | Sobic.010G012900.1               | <a href="#">XP_002437717</a> |
| <i>SbFSD2</i>                             |                                     | <a href="#">Sobic.010G033000</a> | Sobic.010G033000.1               | <a href="#">XP_002436456</a> |

---

<sup>1</sup>, protein sequences were retrieved from the Joint Genome Institute (JGI) (<http://www.phytozome.net>)

<sup>2</sup>, protein sequences were retrieved from the NCBI protein database (<http://www.ncbi.nlm.nih.gov/protein/>)

<sup>3</sup>, protein sequences were retrieved from CottonGen (<https://www.cottongen.org/data/genome>)
