# Supplementary material for: Genome-wide characterization and expression analyses of superoxide dismutase (SOD) genes in Gossypium hirsutum
Source: PubMed Central journal article supplement (PMC5429560; doi:10.1186/s12864-017-3768-5), 2017-05-12
Supplement: 12864_2017_3768_MOESM10_ESM.pdf [file 12864_2017_3768_MOESM10_ESM.pdf]

**Additional file 10: Table S4.** Orthologous *SOD* gene pairs of *G. hirsutum*, *G. arboreum*, and *G. raimondii*.

| Orthologous genes in <i>G. arboreum</i> |               | Genes of At subgenome |             | Genes of Dt subgenome |                | Orthologous genes of <i>G. raimondii</i> |                   |
|-----------------------------------------|---------------|-----------------------|-------------|-----------------------|----------------|------------------------------------------|-------------------|
| ID                                      | Name          | Name                  | ID          | ID                    | Name           | Name                                     | ID                |
| Cotton_A_21978                          | <i>GaCSD1</i> | <i>GhCSD3</i>         | Gh_A13G0817 | Gh_D13G1062           | <i>GhCSD4</i>  | <i>GrCSD1</i>                            | Cotton_D_10024020 |
| Cotton_A_24238                          | <i>GaCSD2</i> | <i>GhCSD1</i>         | Gh_A13G1450 | Gh_D11G2412           | <i>GhCSD6</i>  | <i>GrCSD3</i>                            | Cotton_D_10039927 |
| Cotton_A_30467                          | <i>GaCSD3</i> | <i>GhCSD5</i>         | Gh_A11G2096 | Gh_D05G0857           | <i>GhCSD10</i> | <i>GrCSD5</i>                            | Cotton_D_10006544 |
| Cotton_A_32487                          | <i>GaCSD4</i> | <i>GhCSD7</i>         | Gh_A09G2473 | Gh_D05G2648           | <i>GhMSD4</i>  | <i>GrMSD1</i>                            | Cotton_D_10016246 |
| Cotton_A_04050                          | <i>GaMSD1</i> | <i>GhMSD3</i>         | Gh_A05G2383 | Gh_D10G1852           | <i>GhMSD2</i>  | <i>GrMSD2</i>                            | Cotton_D_10018648 |
| Cotton_A_21263                          | <i>GaMSD2</i> | <i>GhMSD1</i>         | Gh_A10G1595 | Gh_D07G0457           | <i>GhFSD2</i>  | <i>GrFSD1</i>                            | Cotton_D_10009356 |
| Cotton_A_03623                          | <i>GaFSD1</i> | <i>GhFSD1</i>         | Gh_A07G0392 | Gh_D13G0600           | <i>GhFSD4</i>  | <i>GrFSD2</i>                            | Cotton_D_10030063 |
| Cotton_A_26478                          | <i>GaFSD2</i> | <i>GhFSD3</i>         | Gh_A13G0530 |                       |                |                                          |                   |
