# Supplementary material for: Genome-wide characterization and expression analyses of superoxide dismutase (SOD) genes in Gossypium hirsutum
Source: PubMed Central journal article supplement (PMC5429560; doi:10.1186/s12864-017-3768-5), 2017-05-12
Supplement: 12864_2017_3768_MOESM11_ESM.pdf [file 12864_2017_3768_MOESM11_ESM.pdf]

**Additional file 11: Table S5.** Gene Ontology annotations of 18 upland cotton *SOD* genes.

| <b>Gene name</b> | <b>Sequence ID</b>                                 | <b>GO: Molecular function</b>              | <b>GO: Biological process</b>                     | <b>GO: Cellular component</b>     |
|------------------|----------------------------------------------------|--------------------------------------------|---------------------------------------------------|-----------------------------------|
| <i>GhCSD1</i>    | Gh_A13G1450                                        | GO:0005507 : copper ion binding            | GO:0042742 : defense response to bacterium        | GO:0005737 : cytoplasm            |
|                  |                                                    | GO:0005515 : protein binding               | GO:0035195 : gene silencing by miRNA              | GO:0005829 : cytosol              |
|                  |                                                    | GO:0004784 : superoxide dismutase activity | GO:0055114 : oxidation-reduction process          | GO:0005576 : extracellular region |
|                  |                                                    | GO:0008270 : zinc ion binding              | GO:0019430 : removal of superoxide radicals       | GO:0005634 : nucleus              |
|                  |                                                    |                                            | GO:0046688 : response to copper ion               |                                   |
|                  |                                                    |                                            | GO:0010039 : response to iron ion                 |                                   |
|                  |                                                    |                                            | GO:0006979 : response to oxidative stress         |                                   |
|                  |                                                    |                                            | GO:0010193 : response to ozone                    |                                   |
|                  |                                                    |                                            | GO:0009651 : response to salt stress              |                                   |
|                  |                                                    |                                            | GO:0071484 : cellular response to light intensity |                                   |
|                  |                                                    |                                            | GO:0071493 : cellular response to UV-B            |                                   |
|                  | GO:0071329 : cellular response to sucrose stimulus |                                            |                                                   |                                   |
| <i>GhCSD2</i>    | Gh_D13G1747                                        | GO:0005507 : copper ion binding            | GO:0042742 : defense response to bacterium        | GO:0005737 : cytoplasm            |
|                  |                                                    | GO:0005515 : protein binding               | GO:0035195 : gene silencing by miRNA              | GO:0005829 : cytosol              |
|                  |                                                    | GO:0004784 : superoxide dismutase activity | GO:0055114 : oxidation-reduction process          | GO:0005576 : extracellular region |
|                  |                                                    | GO:0008270 : zinc ion binding              | GO:0019430 : removal of superoxide radicals       | GO:0005634 : nucleus              |
|                  |                                                    |                                            | GO:0046688 : response to copper ion               |                                   |
|                  |                                                    |                                            | GO:0010039 : response to iron ion                 |                                   |
|                  |                                                    |                                            | GO:0006979 : response to oxidative stress         |                                   |
|                  |                                                    |                                            | GO:0010193 : response to ozone                    |                                   |
|                  |                                                    |                                            | GO:0009651 : response to salt stress              |                                   |
|                  |                                                    |                                            | GO:0071484 : cellular response to light intensity |                                   |
|                  |                                                    |                                            | GO:0071493 : cellular response to UV-B            |                                   |
|                  | GO:0071329 : cellular response to sucrose stimulus |                                            |                                                   |                                   |
| <i>GhCSD3</i>    | Gh_A13G0817                                        | GO:0005507 : copper ion binding            | GO:0042742 : defense response to bacterium        | GO:0005737 : cytoplasm            |
|                  |                                                    | GO:0005515 : protein binding               | GO:0035195 : gene silencing by miRNA              | GO:0005829 : cytosol              |
|                  |                                                    | GO:0004784 : superoxide dismutase activity | GO:0055114 : oxidation-reduction process          | GO:0005576 : extracellular region |
|                  |                                                    | GO:0008270 : zinc ion binding              | GO:0019430 : removal of superoxide radicals       | GO:0005634 : nucleus              |
|                  |                                                    |                                            | GO:0046688 : response to copper ion               |                                   |
|                  |                                                    |                                            | GO:0010039 : response to iron ion                 |                                   |
|                  |                                                    |                                            | GO:0006979 : response to oxidative stress         |                                   |
|                  |                                                    |                                            | GO:0010193 : response to ozone                    |                                   |
|                  |                                                    |                                            | GO:0009651 : response to salt stress              |                                   |
|                  |                                                    |                                            | GO:0071484 : cellular response to light intensity |                                   |
|                  |                                                    |                                            | GO:0071493 : cellular response to UV-B            |                                   |
|                  | GO:0071329 : cellular response to sucrose stimulus |                                            |                                                   |                                   |

|               |                                                    |                                            |                                                    |                                   |
|---------------|----------------------------------------------------|--------------------------------------------|----------------------------------------------------|-----------------------------------|
| <i>GhCSD4</i> | Gh_D13G1062                                        | GO:0005507 : copper ion binding            | GO:0042742 : defense response to bacterium         | GO:0005737 : cytoplasm            |
|               |                                                    | GO:0005515 : protein binding               | GO:0035195 : gene silencing by miRNA               | GO:0005829 : cytosol              |
|               |                                                    | GO:0004784 : superoxide dismutase activity | GO:0055114 : oxidation-reduction process           | GO:0005576 : extracellular region |
|               |                                                    | GO:0008270 : zinc ion binding              | GO:0019430 : removal of superoxide radicals        | GO:0005634 : nucleus              |
|               |                                                    |                                            | GO:0046688 : response to copper ion                |                                   |
|               |                                                    |                                            | GO:0010039 : response to iron ion                  |                                   |
|               |                                                    |                                            | GO:0006979 : response to oxidative stress          |                                   |
|               |                                                    |                                            | GO:0010193 : response to ozone                     |                                   |
|               |                                                    |                                            | GO:0009651 : response to salt stress               |                                   |
|               |                                                    |                                            | GO:0071484 : cellular response to light intensity  |                                   |
|               |                                                    |                                            | GO:0071493 : cellular response to UV-B             |                                   |
|               | GO:0071329 : cellular response to sucrose stimulus |                                            |                                                    |                                   |
| <i>GhCSD5</i> | Gh_A11G2096                                        | GO:0005507 : copper ion binding            | GO:0055114 : oxidation-reduction process           | GO:0009507 : chloroplast          |
|               |                                                    | GO:0004784 : superoxide dismutase activity | GO:0019430 : removal of superoxide radicals        | GO:0005576 : extracellular region |
|               |                                                    | GO:0008270 : zinc ion binding              | GO:0006979 : response to oxidative stress          | GO:0005573 : vacuole              |
|               |                                                    |                                            | GO:0010193 : response to ozone                     | GO:0005577 : peroxisome           |
|               |                                                    |                                            | GO:0009651 : response to salt stress               |                                   |
|               |                                                    |                                            | GO:0071484 : cellular response to light intensity  |                                   |
|               |                                                    |                                            | GO:0071493 : cellular response to UV-B             |                                   |
|               |                                                    |                                            |                                                    |                                   |
|               |                                                    |                                            |                                                    |                                   |
|               |                                                    |                                            |                                                    |                                   |
|               |                                                    |                                            |                                                    |                                   |
| <i>GhCSD6</i> | Gh_D11G2412                                        | GO:0005507 : copper ion binding            | GO:0055114 : oxidation-reduction process           | GO:0009507 : chloroplast          |
|               |                                                    | GO:0004784 : superoxide dismutase activity | GO:0019430 : removal of superoxide radicals        | GO:0005576 : extracellular region |
|               |                                                    | GO:0008270 : zinc ion binding              | GO:0006979 : response to oxidative stress          | GO:0005573 : vacuole              |
|               |                                                    |                                            | GO:0010193 : response to ozone                     | GO:0005577 : peroxisome           |
|               |                                                    |                                            | GO:0009651 : response to salt stress               |                                   |
|               |                                                    |                                            | GO:0071484 : cellular response to light intensity  |                                   |
|               |                                                    |                                            | GO:0071493 : cellular response to UV-B             |                                   |
|               |                                                    |                                            |                                                    |                                   |
|               |                                                    |                                            |                                                    |                                   |
|               |                                                    |                                            |                                                    |                                   |
|               |                                                    |                                            |                                                    |                                   |
| <i>GhCSD7</i> | Gh_A09G2473                                        | GO:0005507 : copper ion binding            | GO:0035195 : gene silencing by miRNA               | GO:0009507 : chloroplast          |
|               |                                                    | GO:0004784 : superoxide dismutase activity | GO:0055114 : oxidation-reduction process           | GO:0009579 : thylakoid            |
|               |                                                    | GO:0008270 : zinc ion binding              | GO:0019430 : removal of superoxide radicals        | GO:0048046 : apoplast             |
|               |                                                    |                                            | GO:0046688 : response to copper ion                | GO:0009750 : chloroplast stroma   |
|               |                                                    |                                            | GO:0010039 : response to iron ion                  |                                   |
|               |                                                    |                                            | GO:0006979 : response to oxidative stress          |                                   |
|               |                                                    |                                            | GO:0010193 : response to ozone                     |                                   |
|               |                                                    |                                            | GO:0009651 : response to salt stress               |                                   |
|               |                                                    |                                            | GO:0071484 : cellular response to light intensity  |                                   |
|               |                                                    |                                            | GO:0071493 : cellular response to UV-B             |                                   |
|               |                                                    |                                            | GO:0071329 : cellular response to sucrose stimulus |                                   |

|                |             |                                                                                                                |                                                                                                                                                                                                                                                                                                                                                                                                                                                                                         |                                                                                                                |
|----------------|-------------|----------------------------------------------------------------------------------------------------------------|-----------------------------------------------------------------------------------------------------------------------------------------------------------------------------------------------------------------------------------------------------------------------------------------------------------------------------------------------------------------------------------------------------------------------------------------------------------------------------------------|----------------------------------------------------------------------------------------------------------------|
| <i>GhCSD8</i>  | Gh_D09G0858 | GO:0005507 : copper ion binding<br>GO:0004784 : superoxide dismutase activity<br>GO:0008270 : zinc ion binding | GO:0035195 : gene silencing by miRNA<br>GO:0055114 : oxidation-reduction process<br>GO:0019430 : removal of superoxide radicals<br>GO:0046688 : response to copper ion<br>GO:0010039 : response to iron ion<br>GO:0006979 : response to oxidative stress<br>GO:0010193 : response to ozone<br>GO:0009651 : response to salt stress<br>GO:0071484 : cellular response to light intensity<br>GO:0071493 : cellular response to UV-B<br>GO:0071329 : cellular response to sucrose stimulus | GO:0009507 : chloroplast<br>GO:0009579 : thylakoid<br>GO:0048046 : apoplast<br>GO:0009750 : chloroplast stroma |
| <i>GhCSD9</i>  | Gh_A05G0722 | GO:0005507 : copper ion binding<br>GO:0004784 : superoxide dismutase activity<br>GO:0008270 : zinc ion binding | GO:0035195 : gene silencing by miRNA<br>GO:0055114 : oxidation-reduction process<br>GO:0019430 : removal of superoxide radicals<br>GO:0046688 : response to copper ion<br>GO:0010039 : response to iron ion<br>GO:0006979 : response to oxidative stress<br>GO:0010193 : response to ozone<br>GO:0009651 : response to salt stress<br>GO:0071484 : cellular response to light intensity<br>GO:0071493 : cellular response to UV-B<br>GO:0071329 : cellular response to sucrose stimulus | GO:0009507 : chloroplast<br>GO:0009579 : thylakoid<br>GO:0048046 : apoplast<br>GO:0009750 : chloroplast stroma |
| <i>GhCSD10</i> | Gh_D05G0857 | GO:0005507 : copper ion binding<br>GO:0004784 : superoxide dismutase activity<br>GO:0008270 : zinc ion binding | GO:0035195 : gene silencing by miRNA<br>GO:0055114 : oxidation-reduction process<br>GO:0019430 : removal of superoxide radicals<br>GO:0046688 : response to copper ion<br>GO:0010039 : response to iron ion<br>GO:0006979 : response to oxidative stress<br>GO:0010193 : response to ozone<br>GO:0009651 : response to salt stress<br>GO:0071484 : cellular response to light intensity<br>GO:0071493 : cellular response to UV-B<br>GO:0071329 : cellular response to sucrose stimulus | GO:0009507 : chloroplast<br>GO:0009579 : thylakoid<br>GO:0048046 : apoplast<br>GO:0009750 : chloroplast stroma |
| <i>GhFSD4</i>  | Gh_D13G0600 | GO:0046872 : metal ion binding<br>GO:0005515 : protein binding<br>GO:0004784 : superoxide dismutase activity   | GO:0055114 : oxidation-reduction process<br>GO:0019430 : removal of superoxide radicals                                                                                                                                                                                                                                                                                                                                                                                                 | GO:0009507 : chloroplast<br>GO:0009295 : nucleoid<br>GO:0009579 : thylakoid<br>GO:0042646 : plastid nucleoid   |

|               |             |                                                                                                                 |                                                                                                                                                                                                                                                                               |                                                                                                              |
|---------------|-------------|-----------------------------------------------------------------------------------------------------------------|-------------------------------------------------------------------------------------------------------------------------------------------------------------------------------------------------------------------------------------------------------------------------------|--------------------------------------------------------------------------------------------------------------|
| <i>GhMSD1</i> | Gh_A10G1595 | GO:0005507 : copper ion binding<br>GO:0046872 : metal ion binding<br>GO:0004784 : superoxide dismutase activity | GO:0042742 : defense response to bacterium<br>GO:0009793 : embryo development ending in seed dormancy<br>GO:0055114 : oxidation-reduction process<br>GO:0019430 : removal of superoxide radicals<br>GO:0009651 : response to salt stress<br>GO:0010043 : response to zinc ion | GO:0005739 : mitochondrion                                                                                   |
| <i>GhMSD2</i> | Gh_D10G1852 | GO:0005507 : copper ion binding<br>GO:0046872 : metal ion binding<br>GO:0004784 : superoxide dismutase activity | GO:0042742 : defense response to bacterium<br>GO:0009793 : embryo development ending in seed dormancy<br>GO:0055114 : oxidation-reduction process<br>GO:0019430 : removal of superoxide radicals<br>GO:0009651 : response to salt stress<br>GO:0010043 : response to zinc ion | GO:0005739 : mitochondrion                                                                                   |
| <i>GhMSD3</i> | Gh_A05G2383 | GO:0005507 : copper ion binding<br>GO:0046872 : metal ion binding<br>GO:0004784 : superoxide dismutase activity | GO:0042742 : defense response to bacterium<br>GO:0009793 : embryo development ending in seed dormancy<br>GO:0055114 : oxidation-reduction process<br>GO:0019430 : removal of superoxide radicals<br>GO:0009651 : response to salt stress<br>GO:0010043 : response to zinc ion | GO:0005739 : mitochondrion                                                                                   |
| <i>GhMSD4</i> | Gh_D05G2648 | GO:0005507 : copper ion binding<br>GO:0046872 : metal ion binding<br>GO:0004784 : superoxide dismutase activity | GO:0042742 : defense response to bacterium<br>GO:0009793 : embryo development ending in seed dormancy<br>GO:0055114 : oxidation-reduction process<br>GO:0019430 : removal of superoxide radicals<br>GO:0009651 : response to salt stress<br>GO:0010043 : response to zinc ion | GO:0005739 : mitochondrion                                                                                   |
| <i>GhFSD1</i> | Gh_A07G0392 | GO:0046872 : metal ion binding<br>GO:0005515 : protein binding<br>GO:0004784 : superoxide dismutase activity    | GO:0055114 : oxidation-reduction process<br>GO:0009411 : response to UV                                                                                                                                                                                                       | GO:0009507 : chloroplast<br>GO:0009295 : nucleoid<br>GO:0009579 : thylakoid                                  |
| <i>GhFSD2</i> | Gh_D07G0457 | GO:0046872 : metal ion binding<br>GO:0005515 : protein binding<br>GO:0004784 : superoxide dismutase activity    | GO:0055114 : oxidation-reduction process<br>GO:0009411 : response to UV                                                                                                                                                                                                       | GO:0009507 : chloroplast<br>GO:0009295 : nucleoid<br>GO:0009579 : thylakoid                                  |
| <i>GhFSD3</i> | Gh_A13G0530 | GO:0046872 : metal ion binding<br>GO:0005515 : protein binding<br>GO:0004784 : superoxide dismutase activity    | GO:0055114 : oxidation-reduction process<br>GO:0019430 : removal of superoxide radicals                                                                                                                                                                                       | GO:0009507 : chloroplast<br>GO:0009295 : nucleoid<br>GO:0009579 : thylakoid<br>GO:0042646 : plastid nucleoid |
