# Supplementary material for: Genome-wide characterization and expression analyses of superoxide dismutase (SOD) genes in Gossypium hirsutum
Source: PubMed Central journal article supplement (PMC5429560; doi:10.1186/s12864-017-3768-5), 2017-05-12
Supplement: 12864_2017_3768_MOESM12_ESM.pdf [file 12864_2017_3768_MOESM12_ESM.pdf]

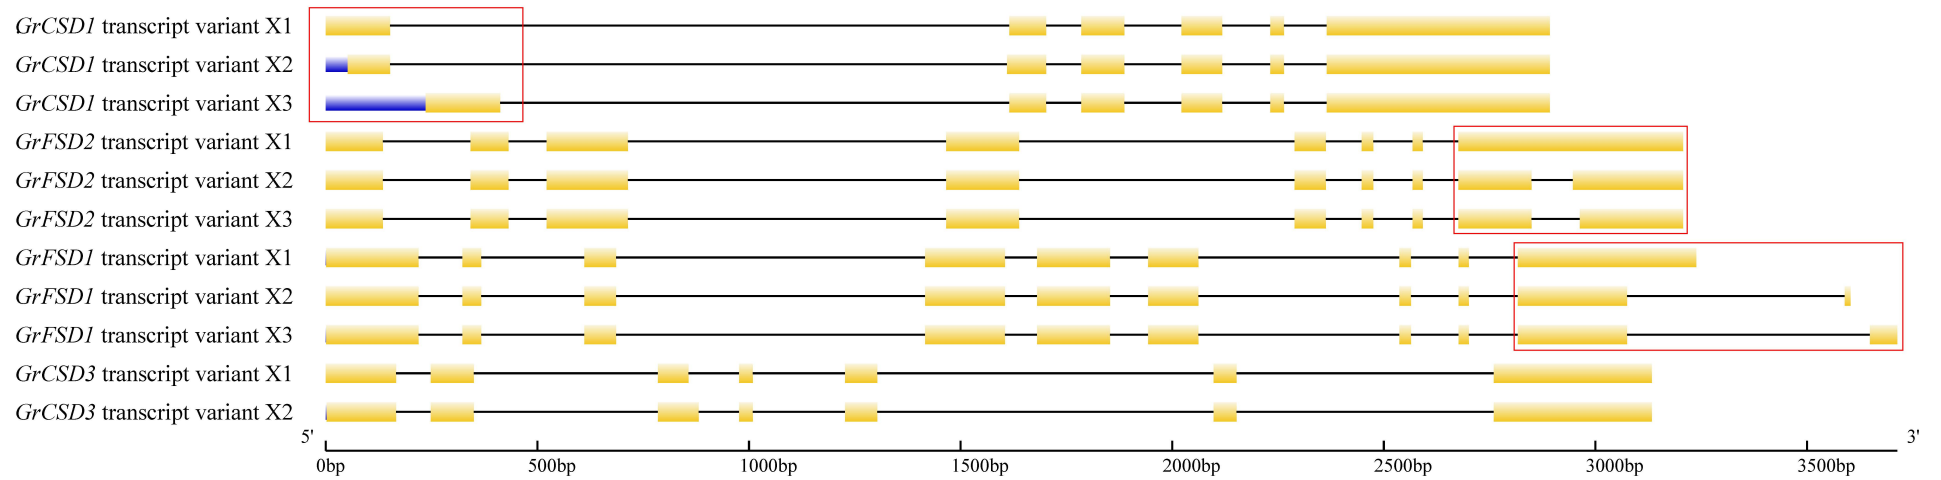

Legend:

CDS
  upstream/ downstream
  Intron

**Additional file 12: Figure S4.** Analysis of alternative splice in 4 *GrSOD* genes with at least two transcript variants. Rectangular frame colored red indicated the exons with differences.
