# Supplementary material for: Genome-wide characterization and expression analyses of superoxide dismutase (SOD) genes in Gossypium hirsutum
Source: PubMed Central journal article supplement (PMC5429560; doi:10.1186/s12864-017-3768-5), 2017-05-12
Supplement: 12864_2017_3768_MOESM13_ESM.pdf [file 12864_2017_3768_MOESM13_ESM.pdf]

**Additional file 13**

(A) The details of *CCS* genes in the genome of upland cotton.

| Gene name     | Sequence ID              | Genomic position       | Description               |
|---------------|--------------------------|------------------------|---------------------------|
| <i>GhCCS1</i> | Gh_A08G1589_NBI-AD1_v1.1 | A08:94358411..94361302 | copper chaperone for SOD1 |
| <i>GhCCS2</i> | Gh_D08G1899_NBI-AD1_v1.1 | D08:56882631..56885395 | copper chaperone for SOD1 |

(B) The sites of *GhCCS*s targeted by *ghr-miR398* and *novel\_mir\_1205*.

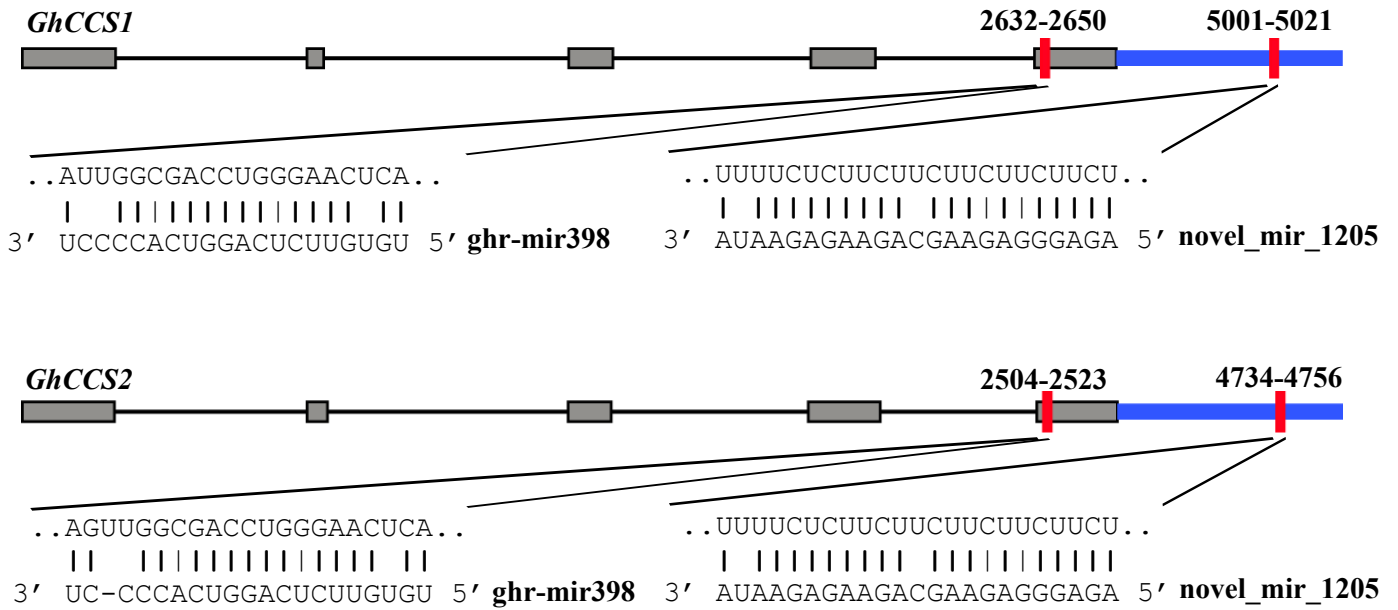

**Legend:**

■ Exon    — Intron    ■ 3' UTR    | miRNA complementary sites with the positions of *GhCCS* gDNAs
